# Salivary gland macrophages assist tissue-resident CD8<sup>+</sup> T cell immune surveillance

B. Stolp<sup>1,2,†</sup>, F. Thelen<sup>1,†</sup>, X. Ficht<sup>1,†</sup>, L. M. Altenburger<sup>3</sup>, N. Ruef<sup>3</sup>, V. V. G. K. Inavalli<sup>4,5</sup>, P. Germann<sup>6,7</sup>, N. Page<sup>8</sup>, F. Moalli<sup>9</sup>, A. Raimondi<sup>9</sup>, K. A. Keyser<sup>10</sup>, S. M. Seyed Jafari<sup>11</sup>, F. Barone<sup>12</sup>, M. S. Dettmer<sup>13</sup>, D. Merkler<sup>8</sup>, M. Iannaccone<sup>9</sup>, J. Sharpe<sup>6,7,14</sup>, C. Schlapbach<sup>11</sup>, O. T. Fackler<sup>2</sup>, U. V. Nägler<sup>4,5</sup>, J. V. Stein<sup>3,\*</sup>

<sup>1</sup> Theodor Kocher Institute, University of Bern, 3012 Bern, Switzerland.

<sup>2</sup> Department for Infectious Diseases, Integrative Virology, Center for Integrative Infectious Disease Research, University Hospital Heidelberg, Im Neuenheimer Feld 344, 69120 Heidelberg, Germany.

<sup>3</sup> Department of Oncology, Microbiology and Immunology, University of Fribourg, 1700 Fribourg, Switzerland.

<sup>4</sup> University of Bordeaux, 33700 Bordeaux, France.

<sup>5</sup> Interdisciplinary Institute for Neuroscience, CNRS UMR 5297, 33077 Bordeaux, France.

<sup>6</sup> EMBL Barcelona, Dr. Aiguader 88, 08003 Barcelona, Spain.

<sup>7</sup> Universitat Pompeu Fabra (UPF), 08002 Barcelona, Spain.

<sup>8</sup> Department of Pathology and Immunology, University of Geneva, 1211 Geneva, Switzerland.

<sup>9</sup> Division of Immunology, Transplantation and Infectious Diseases and Experimental Imaging Center, IRCCS San Raffaele Scientific Institute and Vita-Salute San Raffaele University, Via Olgettina 58, 20132 Milan, Italy.

<sup>10</sup> Institute for Virology, OE5230, Hannover Medical School, Carl-Neuberg-Str. 1, 30625 Hannover, Germany.

<sup>11</sup> Department of Dermatology, Inselspital, Bern University Hospital, University of Bern, Switzerland.

<sup>12</sup> Institute of Inflammation and Ageing, University of Birmingham, Birmingham, United Kingdom.

<sup>13</sup> Institute of Pathology, University of Bern, Switzerland.

<sup>14</sup> Institució Catalana de Recerca i Estudis Avançats (ICREA), Pg. Lluís Companys 23, 08010 Barcelona, Spain.

<sup>†</sup> These authors contributed equally to this work

\* To whom correspondence should be addressed

Contact: Jens V. Stein

Department of Oncology, Microbiology and Immunology

University of Fribourg

Ch. du Musée 5

CH-1700 Fribourg

email: [jens.stein@unifr.ch](mailto:jens.stein@unifr.ch)

### **One sentence summary**

Combined *in vitro* and *in vivo* imaging of salivary gland-resident tissue memory CD8<sup>+</sup> T cells (T<sub>RM</sub>) uncovers their unique migratory behavior and describes a novel accessory function of tissue macrophages to assist T<sub>RM</sub> surveillance.

## Abstract

Tissue macrophages and tissue resident memory CD8<sup>+</sup> T cells (T<sub>RM</sub>) play important roles for pathogen sensing and rapid protection of barrier tissues. To date, it is incompletely understood how these two cell types cooperate for efficient organ surveillance during homeostasis. Here, we used intravital imaging to show that T<sub>RM</sub> dynamically crawled along tissue macrophages in murine submandibular salivary glands (SMG) during the memory phase following a viral infection. *Ex vivo* confined SMG T<sub>RM</sub> integrated an unexpectedly wide range of migration modes: in addition to chemokine- and adhesion receptor-driven motility, SMG T<sub>RM</sub> displayed a remarkable capacity of autonomous motility in the absence of chemoattractants and adhesive ligands. This unique intrinsic SMG T<sub>RM</sub> motility was transmitted by friction and adaptation to microenvironmental topography through protrusion insertion into permissive gaps. Analysis of extracellular space in SMG using super-resolution shadow imaging showed discontinuous attachment of tissue macrophages to neighboring epithelial cells, offering paths of least resistance for patrolling T<sub>RM</sub>. Upon tissue macrophage depletion, intraepithelial SMG T<sub>RM</sub> showed decreased motility and reduced epithelial crossing events, and failed to cluster in response to local inflammatory chemokine stimuli. In sum, our data uncover a continuum of SMG T<sub>RM</sub> migration modes and identify a new accessory function of tissue macrophages to facilitate T<sub>RM</sub> patrolling of the complex exocrine gland architecture.

## Keywords

Tissue-resident CD8<sup>+</sup> T cells; non-lymphoid tissue; tissue macrophages; intravital imaging; super-resolution shadow imaging; exocrine glands; chemokines; adhesion

## 57 Introduction

58 Naïve CD8<sup>+</sup> T cells (T<sub>N</sub>) continuously traffic through lymphoid tissue such as peripheral lymph nodes (PLN)  
 59 and spleen, where they screen antigen presenting dendritic cells (DCs) for the presence of cognate peptide-  
 60 MHC (pMHC) complexes. Intravital two-photon microscopy (2PM) of peripheral lymph nodes (PLN)  
 61 uncovered a high amoeboid-like T<sub>N</sub> motility of 12-15 μm/min (1-4), facilitating their search for rare cognate  
 62 pMHC-presenting DCs interspersed on a 3D stromal scaffold of fibroblastic reticular cells (FRC) (5-10).  
 63 Intranodal motility is mediated by the CCR7 ligands CCL19 and CCL21 that drive F-actin polymerization at the  
 64 leading edge in a Gαi-dependent manner to generate a retrograde cortical actin flow. Cortical actin flow is  
 65 conveyed by the integrin LFA-1 into forward movement without generating substantial substrate adhesion  
 66 (11-15).

67 During viral infections, effector CD8<sup>+</sup> T cells (T<sub>EFF</sub>) generated in reactive lymphoid tissue disseminate into non-  
 68 lymphoid tissues (NLT) including gut, lung, genitourinary tract, and skin to eliminate infected cells. After  
 69 clearance of viral antigens, part of T<sub>EFF</sub> differentiate into central memory T cells (T<sub>CM</sub>) and continue to patrol  
 70 lymphoid organs, while others stably reside in NLT and to a minor extent in lymphoid tissue as non-  
 71 recirculating, self-renewing tissue-resident memory T cells (T<sub>RM</sub>). T<sub>RM</sub> in gut, skin, and genitourinary tract act  
 72 as “first line” sentinels that eliminate infected cells and trigger an organ-wide alert status through cytokine  
 73 secretion upon pathogen re-encounter (16-21). The scanning behavior of epidermal T<sub>RM</sub> has been extensively  
 74 studied. These cells display characteristically elongated, dendritic shapes and move in a Gαi-dependent  
 75 manner with speeds of 1-2 μm/min in proximity to the extracellular matrix (ECM)-rich basement membrane  
 76 (BM) separating epidermis from dermis, i.e. in plane with the bottom keratinocyte layer (22, 23). Upon  
 77 pathogen reencounter, epidermal CD8<sup>+</sup> T cells follow local chemokine signals to accumulate around infected  
 78 cells (24). CD8<sup>+</sup> T cell accumulation is considered critical for cooperative elimination of infected stromal cells  
 79 through repeated cytotoxic attacks (25). Similarly, CD8<sup>+</sup> T<sub>RM</sub> of the small intestine continuously patrol the  
 80 absorptive epithelial layer (26).

81 T<sub>RM</sub> are also present in exocrine glands of the head and neck region, including submandibular salivary glands  
 82 (SMG). Salivary glands are targeted by several bacteria and viruses including human beta- and gamma-  
 83 herpesviruses, which can cause disease, mostly in immunocompromised individuals (27, 28). Similar to skin



84 and gut, SMG contains epithelial tissue basally anchored onto connective tissue. However, while skin and gut  
85 3D geometry is evenly layered, the SMG epithelium has an arborized structure, with acini secreting saliva  
86 into intermediate and collecting ducts. The glandular epithelium is separated by a BM from the supporting  
87 interstitium containing blood and lymphatic vasculature, fibroblasts and tissue macrophages (29). In tissue  
88 sections, most CD8<sup>+</sup> T<sub>RM</sub> in SMG are localized within the abundant acini and ducts, implying a mechanism that  
89 allows T<sub>EFF</sub> arriving in interstitial venules to cross the BM below the epithelial compartment and develop into  
90 memory T cells (30, 31). During acute inflammation of NLT, CD8<sup>+</sup> T cell recruitment is driven by chemokines  
91 and adhesion receptors (32). In contrast, the cellular dynamics of homeostatic T<sub>RM</sub> surveillance in SMG after  
92 viral infection and the involvement of tissue macrophages in this process have not been explored to date.  
93 Here, we used intravital microscopy of mouse SMG in the memory phase following a systemic viral infection  
94 to uncover a high baseline motility of T<sub>RM</sub>, which often followed tissue macrophage topology. *Ex vivo*,  
95 confinement alone in the absence of chemoattractants and adhesion receptors was sufficient to induce SMG  
96 T<sub>RM</sub> migration through friction- and protrusion-insertion-driven motility, which was further tuned by  
97 chemokines and adhesion molecules. Using super-resolution microscopy to explore extracellular space  
98 distribution in SMG, we observed discontinuous attachment of tissue macrophages to surrounding  
99 epithelium, offering paths of least resistance to migrating T<sub>RM</sub>. Accordingly, tissue macrophage depletion  
100 resulted in a significant disruption of T<sub>RM</sub> patrolling behavior. Taken together, our data uncover a new  
101 accessory role for tissue macrophages to enable T<sub>RM</sub> surveillance of salivary glands. Our observations suggest  
102 a continuum of chemokine- and adhesion receptor-dependent and -independent migration modes and  
103 topographic features facilitating this task.

## 104 Results

### 105 *Systemic viral infection leads to the establishment of $T_{RM}$ in salivary glands*

106 We used a viral infection model for a comparative analysis of CD8<sup>+</sup> T cell populations in lymphoid tissue and  
 107 SMG (**Fig. 1A and Fig. S1A**). Systemic infection with lymphocytic choriomeningitis virus (LCMV)-OVA, a  
 108 replication-competent, attenuated LCMV mutant expressing ovalbumin (OVA) as model antigen (33), led to  
 109 transient and low viral titers in spleen on day 3 p.i. that remained below the detection limit in PLN and SMG  
 110 (**Fig. S1B**). Adoptively transferred GFP<sup>+</sup> OT-I CD8<sup>+</sup> TCR tg T cells (which recognize the OVA<sub>257-264</sub> peptide in the  
 111 context of H2-K<sup>b</sup>) (34) underwent a prototypic expansion – contraction kinetic in spleen and PLN over the  
 112 course of 30 days (**Fig. S1, C and D**). Despite the lack of detectable viral titers, OT-I T cells accumulated in  
 113 SMG from day 6 p.i. onwards, with a stable population maintained until at least day 30 p.i. (**Fig. S1, C and D**).  
 114 By day 30 p.i., OT-I T cells isolated from SMG but not PLN or spleen showed increased expression of CD103  
 115 and CD69, while losing the KLRG-1<sup>+</sup> population present on day 6 p.i. (**Fig. S1, E and F**). SMG OT-I T cells also  
 116 upregulated PD-1 and CD44 surface levels (not shown), supporting the observation that most SMG CD8<sup>+</sup> T  
 117 cells had developed into *bona fide*  $T_{RM}$  at day 30 p.i. (35). Memory OT-I CD8<sup>+</sup> T cells isolated from PLN were  
 118 approximately 65% CD62L<sup>+</sup> CD44<sup>high</sup>  $T_{CM}$ , with the remaining population being CD62L<sup>-</sup> CD44<sup>high</sup> memory T cells.  
 119 To take this heterogeneity into account, we refer to memory T cells isolated from PLN as  $T_{PLN-M}$ .  
 120  $T_{RM}$  establishment in SMG was also observed at  $\geq 30$  day after systemic VSV-OVA infection (not shown). In  
 121 addition, we detected memory P14 CD8<sup>+</sup> TCR tg T cells (which recognize the LCMV epitope gp<sub>33-41</sub> in the  
 122 context of H2-D<sup>b</sup>) (36) in SMG after infection with the LCMV Armstrong strain (**Fig. S2, A and B**). In sum,  
 123 systemic viral infection led to the recruitment and retention of CD8<sup>+</sup> T cell populations in SMG, even in the  
 124 absence of detectable viral titers in this organ.

125

### 126 *SMG $T_{RM}$ migration is characterized by dynamic cell shape changes*

127 We next determined the localization of  $T_{PLN-M}$  and  $T_{RM}$  in their target organs during the memory phase. Tissue  
 128 sections showed that most GFP<sup>+</sup> OT-I T cells in PLN and SMG were dispersed evenly in the tissue at day 30  
 129 p.i. (**Fig. 1B**). In PLN, OT-I  $T_{PLN-M}$  cells localized mainly with smooth muscle actin (SMA)<sup>+</sup> FRCs, whereas most  
 130 OT-I  $T_{RM}$  cells in SMG were within or adjacent to EpCAM<sup>+</sup> acini and ducts (**Fig. 1B**). We developed a sequential

surgery method to visualize homeostatic tissue surveillance of  $T_{\text{PLN-M}}$  and  $T_{\text{RM}}$  in PLN and SMG, respectively, in the same host by 2PM (37).  $T_{\text{PLN-M}}$  displayed characteristic amoeboid shapes and moved with high speeds comparable to  $T_{\text{N}}$  ( $11.8 \pm 4.0 \mu\text{m}/\text{min}$ , median  $\pm$  SD) (**Fig. 1, C and F to H; movie S1**). Compared to  $T_{\text{PLN-M}}$ , SMG  $T_{\text{RM}}$  displayed more pronounced shape changes, with several protrusions probing the microenvironment during migration, at times with thin and elongated cell bodies (**Fig. 1, D to G; movie S2**). While  $T_{\text{PLN-M}}$  and  $T_{\text{RM}}$  covered large distances throughout the observation period of intravital imaging sequences (20-60 min), both populations differed in their speed and arrest coefficients, i.e. percentage of track segments with speeds  $< 2.5 \mu\text{m}/\text{min}$ . Thus, SMG  $T_{\text{RM}}$  were significantly slower than  $T_{\text{PLN-M}}$  (**Fig. 1H**) and had higher arrest coefficients (**Fig. 1I**). Nonetheless, SMG  $T_{\text{RM}}$  retained a relatively high motility coefficient, which is a proxy of a cell's ability to scan the environment during random migration, of  $> 15 \mu\text{m}^2/\text{min}$  (**Fig. 1J**). Accordingly, their median speed of  $6.8 \pm 3.4 \mu\text{m}/\text{min}$  was notably higher than values reported for epidermal  $T_{\text{RM}}$  ( $1-2 \mu\text{m}/\text{min}$ ) (22), with some cells achieving speeds of  $> 12 \mu\text{m}/\text{min}$ . Both  $T_{\text{PLN-M}}$  and SMG  $T_{\text{RM}}$  retained a fast response to antigenic stimulation, as systemic administration of cognate peptide resulted in immediate arrest and secretion of IFN- $\gamma$  (**Fig. 1, J and K; Fig. S2, C and D**).

We measured similar speeds for GFP $^{+}$  P14  $T_{\text{RM}}$  in SMG before and after cognate peptide administration (**Fig. S2, A to D**). Furthermore, GFP $^{+}$  OT-I T cells patrolled the structurally comparable lacrimal gland (LG) in the same speed range ( $7.6 \pm 4.3 \mu\text{m}/\text{min}$ ; median  $\pm$  SD;  $n = 255$  tracks), suggesting that migration parameters of  $T_{\text{RM}}$  patrolling exocrine glands during homeostasis are independent of TCR specificity and reflect tissue properties. In sum, our data uncover a remarkably fast motility of exocrine gland-resident CD8 $^{+}$  T cells, which was characterized by dynamic shape changes.

### *$T_{\text{RM}}$ migrate along tissue macrophages during SMG surveillance*

To explore the microenvironmental context of exocrine gland  $T_{\text{RM}}$  migration, we used a CD11c-YFP reporter strain that labels SMG CD64 $^{+}$  F4/80 $^{+}$  tissue macrophages (29). CD11c-YFP $^{+}$  cells were also positive for the macrophage marker Iba-1, whereas some Iba-1 $^{+}$  cells were CD11c-YFP $^{\text{low/negative}}$ , indicating that most but not all tissue macrophages were labeled in CD11c-YFP mice (**Fig. S3, A and B**). Confocal analysis of thick tissue sections showed that CD11c-YFP $^{+}$  tissue macrophages extended numerous protrusions from their cell bodies

throughout the SMG tissue and were located within EpCAM<sup>+</sup> ducts and acini, as well as SMA<sup>+</sup> perivascular structures of the interstitium (**Fig. S3C**). Most macrophage protrusions were phosphotyrosine-positive (**Fig. S3, D and E**) and enriched in F-actin (not shown), suggesting the presence of podosomes or focal adhesions at these sites.

To assess the spatial relationship between tissue macrophages and T<sub>RM</sub>, we transferred GFP<sup>+</sup> OT-I T cells into CD11c-YFP recipients one day prior to infection with LCMV-OVA and analyzed tissue sections by confocal microscopy in memory phase ( $\geq$  day 30 p.i.). We observed a striking spatial proximity of T<sub>RM</sub> and tissue macrophages in SMG, with approximately 70% of OT-I T cells directly in contact with CD11c-YFP<sup>+</sup> cells (**Fig. 2, A and B; movie S3**). The close spatial association between tissue macrophages and T<sub>RM</sub> was confirmed by correlative light and electron microscopy imaging, with both cell membranes adjacent to each other (**Fig. 2C**). Electron microscopy images also highlighted the compact tissue structure of SMG, with tight junctions of acinar and ductal epithelium surrounded by a dense ECM (**Fig. 2D**).

Their spatial proximity to SMG macrophages in tissue sections raised the question whether patrolling T<sub>RM</sub> migrate alongside macrophages. 2PM imaging of GFP<sup>+</sup> T<sub>RM</sub> in LCMV-OVA memory phase CD11c-YFP recipients indeed confirmed that T<sub>RM</sub> crawled along CD11c-YFP<sup>+</sup> macrophages during most of the observation period, with T<sub>RM</sub> shapes often closely matching the underlying macrophage topology. This was particularly evident along thin macrophage protrusions, which T<sub>RM</sub> often followed (**Fig. 2E; movie S4**). At the same time, T<sub>RM</sub> protrusions occasionally detached from macrophages, apparently scanning the surrounding environment. Accordingly, we identified occasional T<sub>RM</sub> track segments which were not associated with tissue macrophages. T<sub>RM</sub> speeds were slightly elevated when in contact with tissue macrophages than when not ( $7.0 \pm 5.3$  versus  $6.1 \pm 4.8$   $\mu\text{m}/\text{min}$ ;  $p < 0.001$ ). Occasionally, we observed small T<sub>RM</sub> clusters around tissue macrophages. Adoptively transferred CXCR3<sup>-/-</sup> T<sub>RM</sub> failed to accumulate at tissue macrophage clusters, suggesting the existence of local CXCL9/CXCL10 “hotspots” at these sites (**Fig. 2F**).

We examined whether the noticeable proximity between tissue macrophages and T<sub>RM</sub> also occurred in other exocrine glands and species. A comparable association of T<sub>RM</sub> and tissue macrophages was observed in LG after LCMV-OVA infection (**Fig. S3F**). Furthermore, CD3<sup>+</sup> T cells colocalized with CD68<sup>+</sup> macrophages in human parotid gland sections, both as dispersed individual cells and in clusters (**Fig. S3, G and H**). Taken together,

185 SMG  $T_{RM}$  colocalized with and moved alongside tissue macrophages during homeostatic tissue patrolling of  
186 several exocrine glands.

187

188 *SMG  $T_{RM}$  motility is induced by confinement and can be tuned by external factors*

189 The close proximity of  $T_{RM}$  to tissue macrophages *in vivo* prompted us to examine the molecular factors  
190 involved in this interaction. We performed quantitative PCR analysis of cytokine and chemokine expression  
191 by CD11c-YFP<sup>+</sup> cells sorted from SMG in steady-state, acute (day 6 p.i.) and memory phase (day 30 p.i.) of  
192 LCMV-OVA infection. We observed detectable mRNA levels of the cytokines IL-1 and TNF, as well as the  
193 chemokines CCL3, CCL4, CXCL2, CXCL9, CXCL10 and CXCL16 (not shown). Expression levels were similar at all  
194 time points analyzed, reflecting the lack of detectable viral spread to this organ (**Fig. S1B**). Given the  
195 expression of promigratory chemokines and adhesion receptors including ICAM-1 on tissue macrophages  
196 (38), we examined their influence on  $T_{RM}$  migration parameters. To this end, we employed under agarose  
197 assays that allow to precisely control environmental factors and provide the confinement required for T cell  
198 motility (**Fig. 3A**) (15). To benchmark our system, we transferred  $T_N$  on CCL21 - and ICAM-1-coated plates as  
199 surrogate lymphoid tissue microenvironment. We observed high chemokinetic  $T_N$  motility with similar speeds  
200 as measured *in vivo* ( $13.3 \pm 5.9 \mu\text{m}/\text{min}$ ) (**Fig. 3, B and C; movie S5**) (14, 15).  $T_{RM}$  showed a high motility ( $11.4$   
201  $\pm 3.0 \mu\text{m}/\text{min}$ ) when migrating on CXCL10 + CXCL12- and ICAM-1-coated plates, which was only slightly lower  
202 than that of  $T_N$  (**Fig. 3C; movie S6**). These observations show that SMG  $T_{RM}$  respond to presence of  
203 chemokines and adhesion molecules with high speeds.

204 We then examined T cell displacement on plates coated with fatty acid-free human serum albumin (HSA) and  
205 thus free of chemoattractants and specific adhesion ligands. In line with previous findings (15),  $T_N$  and  $T_{PLN-M}$   
206 remained essentially immobile throughout the observation period (**Fig. 3, D to F; movies S7 and S8**). Under  
207 these conditions, only 16% of  $T_N$  and 31% of  $T_{PLN-M}$  migrated faster than  $3 \mu\text{m}/\text{min}$ , and showed low  
208 directionality (**Fig. 3, G and H**). In contrast, most SMG  $T_{RM}$  showed robust intrinsic motility on HSA-coated  
209 plates despite the absence of chemoattractants and adhesion molecules (**Fig. 3, D to F; movies S7 and S8**).  
210 Almost 70% of SMG  $T_{RM}$  migrated faster than  $3 \mu\text{m}/\text{min}$  with high directionality, with their median speed of  
211  $5.5 \mu\text{m}/\text{min}$  approaching values observed *in vivo* (**Fig. 3, G and H**). High temporal resolution imaging revealed

that migratory  $T_{RM}$  often formed several protrusions along the leading edge that appeared to probe the environment, followed by rapid displacement of the cell body along one of the protrusions (**movie S9**). Thus, unexpectedly, confinement alone was sufficient to induce spontaneous SMG  $T_{RM}$  migration, representing to the best of our knowledge the first observation of such a motility mode in resting T cells. Their speeds were increased in presence of chemokines and adhesion molecules, suggesting that external promigratory factors tune intrinsic cell motility.

### *Friction mediates $T_{RM}$ migration in the absence of chemokines and ICAM-1*

We set out to characterize the requirements for autonomous  $T_{RM}$  motility in under agarose assays. Reflecting the absence of chemoattractants and integrin ligands, pertussis toxin (PTx) treatment or addition of the  $\beta$ 1-blocking peptide RGD did not affect  $T_{RM}$  speeds in this setting (**Fig. 3I**). Although Mac-1 binds weakly to serum albumin (39), addition of anti-Mac-1 mAb did not cause a significant reduction in  $T_{RM}$  speeds (**Fig. 3I**). These observations suggested a friction-based migration mechanism (40). Friction is the resisting force when two elements slide against each other and may be composed of a number of fundamental forces. While the nature of the weak interactions between  $T_{RM}$  and migratory surface causing friction are not defined, we hypothesized that these might in part involve bivalent cations. Indeed, chelation of bivalent cations by EDTA caused a strong decrease of  $T_{RM}$  speeds under agarose (**Fig. 3I**). High temporal resolution imaging showed that despite the lack of translocation in presence of EDTA,  $T_{RM}$  continued to probe the environment via transient protrusion formation, essentially “running on the spot” (**Fig. 3, J and K, movie S10**). This behavior precipitated a loss in the motility coefficient (**Fig. 3L**). In sum, our data suggest that bivalent cation-dependent friction between  $T_{RM}$  and the confining 2D surfaces generated sufficient traction for translocation in the absence of considerable surface binding.

### *SMG $T_{RM}$ insert protrusions between adjacent structures for translocation*

In addition to friction-based migration, protrusion insertion has emerged in recent years as a complementary mechanism to allow cell migration without specific adhesions (40). The continuous probing of  $T_{RM}$  in presence of EDTA (**Fig. 3J**) provided an opportunity to test whether topographic features of the environment such as

narrow intercellular spaces may rescue cell motility by permitting insertion of pseudopods as mechanical “footholds” (41, 42). As a surrogate approach to re-introduce a “2.5D” environmental geometry in under agarose assays, we co-transferred a surplus of  $T_N$  together with  $T_{RM}$  and performed time-lapse imaging in the presence of EDTA and in the absence of chemoattractants and adhesion molecules (**Fig. 4A**). Remarkably,  $T_{RM}$  localized within  $T_N$  clusters frequently showed lateral displacement despite the presence of EDTA (**movies S10 and S11**). Under these conditions,  $T_{RM}$  displacement occurred through insertion of protrusions between adjacent  $T_N$  and subsequent translocation of the cell body accompanied by dynamic cell shape changes (**Fig. 4B**).  $T_{RM}$  within  $T_N$  clusters were significantly faster than isolated  $T_{RM}$  ( $5.8 \pm 3.0$  and  $2.3 \pm 1.7$   $\mu\text{m}/\text{min}$ , respectively), displayed higher directionality, and resembled in cell shape and speeds  $T_{RM}$  migrating *in vivo* (**Fig. 4C to E**). Once  $T_{RM}$  had traversed  $T_N$  clusters, they returned to their probing behavior without efficient translocation, indicating a close interdependence on physical contact and motility (**movie S10**).

We then examined whether potential residual molecular interactions between naive T cells and  $T_{RM}$  might act as drivers of migration. We therefore transferred uncoated polystyrene beads with  $T_{RM}$  in under agarose assays. These beads replaced  $T_N$  as surrogate 2.5D structures and allowed to examine protrusion insertion in the absence of potential adhesive interactions. In this setting,  $T_{RM}$  recapitulated the behavior observed within  $T_N$  clusters, showing effective cell displacement only when in contact with clusters of beads for protrusion insertion (**Fig. 4F; movie S12**).  $T_{RM}$  speeds increased to  $6.4 \pm 1.9$   $\mu\text{m}/\text{min}$  and became more directional when in contact with beads, whereas isolated  $T_{RM}$  showed no displacement (**Fig. 4, G and H**). In this setting, we further observed that  $T_{RM}$  moved around dense bead areas, in line with a search for permissive gaps for locomotion (**movie S12**). In sum, SMG  $T_{RM}$  displayed a unique ability to migrate by adapting to topographic features of the environment through protrusion insertion and shape deformation, even in the absence of considerable friction, chemoattractants and adhesion receptors.

#### *Residual in vivo motility of SMG $T_{RM}$ in presence of integrin and chemokine receptor blockade*

Our *in vitro* experiments raised the question to which extent external cues govern  $T_{RM}$  motility *in vivo*. We explored the molecular mechanisms underlying  $T_{RM}$  scanning of SMG, focusing on well-described canonical chemoattractant- and integrin-signaling pathways. Integrins provide traction and force transmission through

engagement of their ligands expressed by many cell types including macrophages, such as ICAM-1. SMG  $T_{RM}$  express  $\alpha 1$ ,  $\alpha 4$ ,  $\alpha E$ ,  $\alpha L$ ,  $\beta 1$ ,  $\beta 2$  and  $\beta 7$  integrins, and low levels of  $\alpha V$  (**Fig. S1 and 4A**). To assess their involvement in SMG  $T_{RM}$  immune surveillance, we administered a mix of integrin-blocking mAbs against the major lymphocyte integrin  $\alpha L$  (CD11a/CD18, LFA-1), the E-cadherin ligand  $\alpha E$  (CD103), and  $\alpha 4$  (VLA-4 and  $\alpha 4\beta 7$ ) to LCMV-OVA memory phase mice containing  $T_{PLN-M}$  and  $T_{RM}$  (**Fig. 5A**). We confirmed that mAbs were saturating surface integrins at the time point analyzed (**Fig. S4B**). We then followed OT-I T cell motility in PLN and SMG on  $\geq$  day 30 p.i., using dual surgery 2PM as described above. Integrin blockade significantly lowered  $T_{PLN-M}$  speeds from 11.7 to 8.8  $\mu m/min$  (**Fig. S4C**), similar to the decreased cell speeds of CD18-deficient  $T_N$  in lymphoid stroma (14). In contrast,  $T_{RM}$  speeds and crawling along tissue macrophages remained unaltered by this treatment (**Fig. 5, B and C; movie S13**). We did not detect Mac-1 (CD11b/CD18) expression on SMG  $T_{RM}$  by flow cytometry, and addition of anti-Mac1 mAb to the integrin blocking mix did not decrease  $T_{RM}$  speeds or guidance by tissue macrophages (not shown). Similarly, inclusion of blocking mAbs against  $\alpha 1$  and  $\alpha V$  together with  $\alpha L$ ,  $\alpha 4$  and  $\alpha E$  had no impact on  $T_{RM}$  cells speeds or association with macrophages ( $6.5 \pm 2.7 \mu m/min$ ;  $n = 68$  tracks).

Poor surface saturation of blocking anti- $\beta 1$  mAbs on OT-I T cells preempted us to assess the role of  $\beta 1$  integrins for  $T_{RM}$  motility by this approach (not shown). As alternative, we directly administered the  $\beta 1$ -blocking peptide RGD or the control peptide RAD through the Wharton's duct (WD) into SMG and followed its impact on  $T_{RM}$  motility parameters by 2PM. The WD channels saliva from SMG into the oral cavity and can be used to administer reagents or pathogens through retrograde duct cannulation (43). Control experiments using WD administration of OVA<sub>257-264</sub> peptide led to instantaneous arrest of  $T_{RM}$  similar to systemic injection, suggesting efficient peptide permeation of SMG by this route (not shown). While WD injection of either peptide slightly lowered  $T_{RM}$  speeds, we did not observe any impact on RGD administration on  $T_{RM}$  motility parameters as compared to control peptide (**Fig. 5D**). This reflected low  $\beta 1$  integrin levels in the interface between macrophages and  $T_{RM}$  (**Fig. S4D**). Furthermore, E-cadherin levels on macrophages and  $T_{RM}$  were barely detectable in SMG tissue sections, arguing against a role for this cadherin in mediating close spatial association with tissue macrophages (**Fig. S4E**).



292 Cytokine-driven chemoattractant production plays a key role for T cell trafficking. Since the CXCR3 ligands  
 293 CXCL9 and CXCL10 play a role in T<sub>RM</sub> clustering in SMG (**Fig. 2F**), we co-transferred WT and CXCR3<sup>-/-</sup> OT-I T  
 294 cells one day prior to LCMV-OVA infection. Consistent with recent reports (44), we found that absence of  
 295 CXCR3 did not impair T<sub>RM</sub> formation in SMG after viral infection. Non-clustered CXCR3<sup>-/-</sup> OT-I T<sub>RM</sub> showed no  
 296 significant differences in speeds as compared to WT T<sub>RM</sub> (**Fig. 5E**), and lack of CXCR3 did not prevent T<sub>RM</sub>  
 297 patrolling along tissue macrophages (**Fig. 2F**).

298 To comprehensively assess a function for potential chemoattractants, we inhibited Gαi signaling by systemic  
 299 PTx treatment (45) and performed 2PM analysis of OT-I T cell motility parameters on ≥ day 30 after LCMV-  
 300 OVA infection. To control for inhibitor efficacy, we took advantage of the dual surgery of PLN and SMG in the  
 301 same recipient. Systemic PTx administration significantly slowed T<sub>PLN-M</sub> down from 11.3 μm/min in control  
 302 versus 8.6 μm/min in PTx-treated recipients (**Fig. S4F**), resembling observations made with PTx-treated T<sub>N</sub> in  
 303 PLN (11, 13). Speeds were also decreased in SMG T<sub>RM</sub> (from 6.6 to 5.5 μm/min) by PTx treatment (**Fig. 5F**),  
 304 suggesting a role for chemoattractants in mediating high T<sub>RM</sub> speeds. Nonetheless, we observed a robust  
 305 residual motility and continued T<sub>RM</sub> crawling along tissue macrophages in presence of PTx (**Fig. 5G, movie**  
 306 **S14**). These data suggest that while Gαi-coupled receptors contribute to SMG T<sub>RM</sub> motility, they are not  
 307 required for T<sub>RM</sub> association with tissue macrophages. Finally, since matrix metalloproteinases (MMP) play  
 308 roles in cancer cell invasion, we interfered with MMP activity using the broad MMP-9, MMP-1, MMP-2, MMP-  
 309 14 and MMP-7 inhibitor marimastat as described (46). Yet, MMP inhibition did not reduce T<sub>RM</sub> migration  
 310 compared to vehicle and rather resulted in a minor increase in speeds (not shown). Taken together, with  
 311 exception of a minor effect by PTx, the *in vivo* inhibitor treatment examined here did not alter T<sub>RM</sub> motility  
 312 and close spatial proximity to tissue macrophages.

313 To directly assess intercellular adhesion between tissue macrophages and T<sub>RM</sub> *ex vivo*, we co-incubated  
 314 freshly isolated cells for 20 min and analyzed cluster formation by flow cytometry (**Fig. 5H**). As positive control  
 315 for T cell association with tissue macrophages, we pre-incubated macrophages with cognate OVA<sub>257-264</sub>  
 316 peptide. While addition of OVA<sub>257-264</sub> to tissue macrophages induced detectable association with T<sub>RM</sub>, baseline  
 317 association between both populations remained low (**Fig. 5, H and I**). Finally, we performed under agarose  
 318 assays in presence of tissue macrophages. On the few occasions when motile T<sub>RM</sub> contacted co-plated tissue

macrophages, these contacts were mostly transient (**Fig. 5, J and K; movie S15**). Furthermore,  $T_{RM}$  did not crawl along macrophage protrusions as observed *in vivo* (**Fig. 5J**). These data suggested that  $T_{RM}$  association to macrophages occurred preferentially in the SMG microenvironment. Thus, within the technical limitations of our experimental approach, our *in vivo* and *in vitro* observations did not identify specific molecules that provide strong adhesion of SMG  $T_{RM}$  to tissue macrophages. Importantly, our data do not exclude the presence of unidentified adhesion receptors mediating  $T_{RM}$  association to tissue macrophages *in vivo*.

### *Discontinuous macrophage attachment within SMG*

We considered that tissue microanatomy may contribute to the close spatial association between  $T_{RM}$  and tissue macrophages observed *in vivo*. Based on our observation that *ex vivo* SMG  $T_{RM}$  are able to insert protrusions into narrow spaces between adjacent structures lacking adhesion between them (**Fig. 4**), we decided to examine macrophage attachment within SMG applying the super-resolution shadow imaging microscopy (SUSHI) technique. SUSHI was originally developed to visualize the complex topology of the extracellular space (ECS) in living brain slices (47). It was used to study dynamic changes in ECS in response to a hyperosmotic challenge, which leads to cell shrinkage and ECS widening in brain tissue. Here, we adapted SUSHI imaging to acutely sliced SMG sections, which were superfused with the cell-impermeable fluorescent dye Calcein (**Fig. 6A**). Steady-state imaging revealed that the interstitium contained more ECS as compared to the tightly packed epithelium (**Fig. 6, B and C**). We reasoned that SUSHI in combination with hyperosmotic challenge could be applied to explore attachment between neighboring cells. Performing time-lapse ECS imaging, we acutely increased the osmolarity to induce cell shrinkage, which led to a strong increase of ECS in the interstitium (**movie S16**). In turn, interepithelial junctions remained relatively stable and only mildly increased their spacing under osmotic challenge, reflecting the presence of adherens and tight junctions known to link epithelial cells (**Fig. 6D**). In contrast, hyperosmolarity induced intraepithelial CD11c-YFP<sup>+</sup> macrophages detachment from the adjacent epithelium (**Fig. 6, E and F**). This observation confirms previous reports that tissue macrophages do not form continuous adhesive contacts with the epithelium, unlike the extensive cell-to-cell contacts between acinar epithelial cells (48).

We then investigated the spatial arrangement of macrophage protrusions with regard to epithelial BM markers. The laminin ligand CD49f ( $\alpha 6$ ) was prominent on the basal side of acini and to a lesser extent on ducts, which were identified by the presence of the tight junction protein ZO-1 on the luminal side. In some cases, tissue macrophages appeared to cross adjacent acini and ducts via their protrusions (**Fig. 6G**). For a detailed examination, we analyzed laminin-stained tissue sections from immunized CD11c-YFP mice. We observed in some cases macrophage protrusions penetrating between adjacent acini, or between epithelium and connective tissue, thus bridging adjacent compartments separated by BM (**Fig. 6H; movie S17**). Using correlative confocal and transmission electron microscopy, we validated that some macrophage protrusions transversed BM (**Fig. 6I**). Taken together, our data support the notion of discontinuous attachment of tissue macrophages to neighboring cells and occasional penetration of macrophage protrusions across the epithelial BM.

#### *Depletion of tissue macrophages disrupts $T_{RM}$ patrolling*

Our observations prompted us to examine  $T_{RM}$  motility in the absence of tissue macrophages. To this end, we generated bone marrow chimera by reconstituting C57BL/6 or Ubi-GFP mice with control CD11c-YFP or CD11c-DTR bone marrow. At 6 weeks of reconstitution, we adoptively transferred GFP<sup>+</sup> or DsRed<sup>+</sup> OT-I T cells, followed by LCMV-OVA infection. In some experiments, we directly transferred OT-I T cells into CD11c-DTR mice and infected mice with LCMV-OVA. Both approaches allowed us to deplete CD11c<sup>+</sup> macrophages by diphtheria toxin (DTx) treatment in the memory phase without affecting the unfolding of the adaptive immune response. Macrophage depletion in the memory phase had no impact on CD45<sup>+</sup> and OT-I T cell numbers recovered from spleens and SMG up to one week after DTx treatment (not shown).

2PM imaging in DTx-treated mice revealed that SMG  $T_{RM}$  patrolling behavior was disrupted when macrophages were depleted (**Fig. 7A; movie S18**).  $T_{RM}$  motility was decreased, reflected by less displacement (**Fig. 7B**) and slower speeds (**Fig. 7C**). Also, we occasionally observed cells that returned and migrated back the same path within acini and ducts after macrophage depletion (**Fig. 7A**). To quantify this behavior, we developed a method to specifically retrieve U-turns from track parameters (**Fig. 7D**). This analysis confirmed that the percent of T cell tracks showing U-turns was doubled in DTx-treated CD11c-DTR SMG from 8.1 to

16.7 % of tracks (**Fig. 7E**). For comparison, PTx treatment had essentially no impact on U-turn frequency (1.15 fold increase as compared to PTx<sub>mut</sub>). We observed a similar impact of macrophage depletion on T<sub>RM</sub> speeds in LG (from  $7.6 \pm 4.3$  to  $5.5 \pm 3.2$   $\mu\text{m}/\text{min}$ ), with a 2.5 fold increase in U-turns (**Fig. S5**).

We next asked how impaired motility impacts organ surveillance. We generated tracks *in silico* from the data sets obtained by 2PM imaging of DTx- and control-treated SMG and assessed the average T<sub>RM</sub> dwell time in a sphere of 80  $\mu\text{m}$  diameter as surrogate epithelial structure (**Fig. 7D**). This analysis uncovered a nearly threefold increased sphere dwell time from  $24 \pm 1.8$  min for control SMG to  $69 \pm 6.5$  min (median  $\pm$  SEM) for DTx-treated CD11c-DTR SMG (**Fig. 7F**). For comparison, sphere dwell time was increased from  $31 \pm 1.8$  min in PTx<sub>mut</sub>-treated to  $46 \pm 2.45$  min for PTx-treated SMG. Taken together, macrophage depletion disrupted motility parameters and increased the propensity of T<sub>RM</sub> to make U-turns.

We investigated whether lack of macrophages may also affect T<sub>RM</sub> transitions into and out of epithelium as part of the impaired motility pattern. To address this point, we developed an approach to optically separate epithelial from connective tissue. We reconstituted irradiated Ubi-GFP mice expressing GFP in all cells with CD11c-YFP bone marrow before transfer of DsRed<sup>+</sup> OT-I T cells and systemic LCMV-OVA infection. We found that in these chimera, acini and ducts of surgically prepared SMG were GFP<sup>bright</sup> and readily identifiable by their glandular shapes, whereas connective tissue was GFP<sup>low</sup>. Using case-by-case 3D rendering of 2PM image sequences in memory phase ( $\geq 30$  days p.i. with LCMV-OVA), we observed that DsRed<sup>+</sup> T<sub>RM</sub> were not restricted to individual epithelial structures but occasionally crossed between adjacent acini or between epithelial and connective tissue compartments in a bidirectional manner along macrophage protrusions (**Fig. 7G top; movie S19**). We confirmed this observation in a mouse model expressing membrane tomato and CD11c-YFP (**Fig. 7G bottom**). In total, 75% of T<sub>RM</sub> transits ( $n = 42$ ) into and out of epithelial structures occurred along macrophage protrusions (**Fig. 7H**). Given that not all tissue macrophages are YFP<sup>+</sup> (**Fig. S3B**), the actual percentage of macrophage-assisted transitions may still be higher. DTx treatment of CD11c-DTR SMG reduced, but did not abolish, T<sub>RM</sub> transit into or out of acini and ducts. In total, we observed 55 T<sub>RM</sub> crossing events into or out of acini in CD11c-YFP versus 12 events in CD11c-DTR chimera SMG. These data corresponded to a 77% fewer crossing events per h track duration and a 71% fewer transitions per 1000  $\mu\text{m}$

track length in macrophage-depleted SMG (**Fig. 7, I and J; movie S18**). Reduced  $T_{RM}$  crossing into and out of epithelial structures was also observed when we prolonged DTx treatment for 5 days (**movie S20**).

# *Impaired intraorgan accumulation of SMG $T_{RM}$ after macrophage depletion*

Tissue macrophages are best characterized for their core functions of maintenance or restoration of tissue homeostasis by engulfing apoptotic cells (efferocytosis), clearing debris and initiation of repair (49-52). Accordingly, we observed massively increased numbers of infected cell foci in macrophage-depleted SMG after WD infection with murine cytomegalovirus expressing OVA and mCherry (53), as compared to SMG containing tissue macrophages (**Fig. S6, A and B**). The efferocytic function of tissue macrophages was independent of the presence of  $T_{RM}$  (**Fig. S6C**), although the latter partially suppressed viral replication as assessed by decreased mCherry intensity in viral foci (**Fig. S6D**). In support of this, we observed CD11c-YFP<sup>+</sup> cells engulfing MCMV-infected cells after SMG infection (**Fig. S6, E and F**). These observations preempted the use of a viral rechallenge model to assess a function for tissue macrophages in facilitating  $T_{RM}$  patrolling. We therefore designed an alternative experiment to assess the support of SMG macrophages for  $T_{RM}$  surveillance and local cluster formation. We treated LCMV-OVA-immunized CD11c-YFP and CD11c-DTR BM chimera mice with DTx, followed one day later by local injection of the CXCR3 ligand CXCL10 into SMG (**Fig. 7K**). We also administered anti- $\alpha$ 4 and LFA-1 blocking mAbs that block recruitment of circulating T cells to SMG (44) but do not affect  $T_{RM}$  motility in this organ (**Fig. 5B**). At 4 h after CXCL10 administration, we isolated SMG and quantified  $T_{RM}$  enrichment in thick confocal SMG sections according to the area marked by the co-injected fluorescent marker. CXCR3<sup>-/-</sup> OT-I T cells did not show accumulation in CXCL10 injection sites, supporting the specificity of chemokine-triggered clustering (49 - 63 > 500  $\mu$ m versus 60 - 68 cells/cm<sup>2</sup> cells < 500  $\mu$ m from injection site; range from two SMG each). WT OT-I  $T_{RM}$  were twofold enriched at CXCL10 injection sites, suggesting that these cells had followed a CXCL10 gradient or became retained during their surveillance path (**Fig. 7L**). In contrast, local accumulation of  $T_{RM}$  was lost when macrophages had been depleted, although  $T_{RM}$  numbers outside the site of chemokine injection remained comparable to macrophage-containing SMG (**Fig. 7L**). These data suggest a key role for SMG macrophages to assist  $T_{RM}$  patrolling within and between epithelial structures and to cluster at local inflammatory sites (**Fig. S7**).

## 425 Discussion

426 After clearing of pathogens, T<sub>RM</sub> display a remarkable capacity to patrol heterogeneous tissues without  
 427 impairing vital organ functions (16-20). Their scanning behavior evolved because T cells are MHC-restricted  
 428 and hence need to physically probe membrane surfaces of immotile stromal cells. The key point of this study  
 429 was to examine how these cells achieve this feat in the complex arborized epithelial structure of SMG during  
 430 homeostatic immune surveillance. Our main finding is that T<sub>RM</sub> mostly moved along tissue macrophages, and  
 431 that depletion of macrophages impaired T<sub>RM</sub> patrolling. These observations assign a new accessory role to  
 432 tissue macrophages in addition to their core functions for tissue homeostasis and sentinels of infection. Our  
 433 data suggest two non-exclusive options to explain macrophage guidance of T<sub>RM</sub>: first, through unidentified  
 434 specific adhesive interaction(s) independent of ICAM-1 and other adhesion molecules; and second, by  
 435 offering paths of least resistance within the exocrine gland microenvironment for protrusion insertion by  
 436 autonomously moving T cells. Our data provide evidence for the second option without discarding the first  
 437 one. Reductionist *in vitro* experiments revealed that SMG T<sub>RM</sub> respond to exogenous cues from  
 438 chemoattractant and adhesion molecules. Remarkably, confinement alone suffices to trigger friction- and  
 439 protrusion insertion-based motility without exogenous chemoattractants or adhesion molecule. We  
 440 speculate that the continuum of intrinsic motility and integration of external factors permits T<sub>RM</sub> to patrol  
 441 these exocrine glands in homeostasis and rapidly respond to inflammatory stimuli.

442 Macrophages and T cells closely cooperate during the onset of inflammation, the effector phase and  
 443 contraction through antigen presentation, cytokine secretion and effector functions such as phagocytosis.  
 444 Yet, little is known whether and how these two cell types collaborate for surveillance of NLT during  
 445 homeostasis. Tissue macrophages are best characterized for their core function of maintenance or  
 446 restoration of tissue homeostasis by engulfing apoptotic cells, clearing debris and initiation of repair (49-52,  
 447 54). A recent study has identified a role for tissue macrophages for cloaking of microlesions (55), a behavior  
 448 we also observed in SMG after local laser injury (not shown). Tissue macrophages also serve as sentinels of  
 449 infection, leading to cytokine secretion and leukocyte recruitment (16, 56, 57). In recent years, several non-  
 450 phagocytic and non-sentinel functions were assigned to macrophages, as core functions of parenchymal  
 451 parts of organs are outsourced to accessory cells. Accessory macrophage functions include blood vessel and

452 mammary duct morphogenesis, hematopoietic stem cell maintenance, pancreatic cell specification, lipid  
 453 metabolism, relay of long-distance signals during zebrafish patterning and electric conduction in the heart  
 454 (58, 59). Our data suggest a novel accessory function, which is to facilitate T<sub>RM</sub> patrolling within and between  
 455 acini and ducts of arborized secretory epithelium.

456 Our initial assumption was that specific adhesion receptors drive T cell association with tissue macrophages,  
 457 while chemoattractants fuel their high baseline motility. Tissue macrophage express ICAM-1 and other  
 458 adhesion molecules that can serve as ligands for T cell adhesion receptors, as well as chemoattractants (38).  
 459 It was therefore startling that - against our initial expectations - we were unable to find evidence for strong  
 460 adhesive contacts between salivary gland macrophages and T<sub>RM</sub>. The experimental systems we have used to  
 461 address this point encompass *in vivo* inhibition of adhesion receptors in combination with reductionist *in*  
 462 *vitro* adhesion assays. Such assays have previously been employed to identify intercellular adhesion through  
 463 specific molecular interactions, such as ICAM-1-driven binding between T cells and DCs (60). It is important  
 464 to note our data do not rule out the presence of specific adhesive and/or promigratory interactions between  
 465 T<sub>RM</sub> and tissue macrophages *in situ*. For instance, low T<sub>RM</sub> binding to tissue macrophages *in vitro* may be owing  
 466 to altered gene expression patterns after macrophage isolation (61). Along the same line, we have not  
 467 examined talin-deficient T cells that lack functional integrins, and poor surface mAb saturation preempted  
 468 an analysis of CD44 for SMG T<sub>RM</sub> motility (62). Of note, PTx treatment induced a minor but significant  
 469 reduction in T<sub>RM</sub> speeds *in vivo*. Yet, PTx treatment had essentially no impact on U-turn frequency and  
 470 movement along tissue macrophages. In line with this, recent observations suggest that guidance and  
 471 adhesion do not necessarily correlate, as T<sub>N</sub> migrate along the FRC network even in the absence of LFA-1 and  
 472 CCR7 (15). The influence of the physical properties of the microenvironment is increasingly recognized to  
 473 play a central role for decision-taking by migrating leukocytes (63, 64). Yet, technical limitations in recreating  
 474 the complex tissue microenvironment of exocrine glands under controlled *in vitro* conditions limit the  
 475 experimental scope to address this issue in a definite manner.

476 The canonical model of leukocyte migration postulates chemoattractant-stimulated F-actin polymerization  
 477 at the leading edge (4). The resulting retrograde F-actin flow in turn generates traction and cell body  
 478 translocation via an integrin “clutch” that binds to adhesion receptors of the ECM or on the surface of



479 neighboring cells. Although integrin-independent migration in 3D matrices has become a widely accepted  
 480 concept in cell biology based on studies with cell lines and DCs (40), several studies uncovered integrin  
 481 involvement during immune surveillance of skin T cells (65, 66). Thus, it remained unclear to which extent  
 482 integrin-free motility occurs in primary lymphocytes, which contain less cytoplasm and surface area as  
 483 compared to DCs and cell lines. Another open question was whether memory T cells from distinct anatomical  
 484 locations would employ similar or tissue-specific mechanisms of host surveillance. Work by Zaid et al. has  
 485 identified a critical role of G-protein-coupled receptor signaling during scanning by epidermal  $T_{RM}$  (66). Our  
 486 own observations confirm that similar to  $T_N$  and  $T_{PLN-M}$ , *ex vivo* confined epidermal  $T_{RM}$  do not migrate in the  
 487 absence of integrin ligands or chemoattractants (not shown). Spontaneous motility under 2D confinement  
 488 appears to constitute therefore a distinctive hallmark of SMG  $T_{RM}$  not shared by other resting T cells. Isolated  
 489  $T_{RM}$  showed high intrinsic protrusive activity *in vitro*, which may reflect high F-actin turnover and/or increased  
 490 Rho-ROCK-mediated actomyosin contractility. In fact, low adhesiveness under confinement induces  
 491 spontaneous amoeboid motility via cortical contractility in adherent mesenchymal cell lines (67, 68),  
 492 suggesting that  $T_{RM}$  may use a similar mechanism for autonomous migration *in vitro* and *in vivo*. Yet, it  
 493 remains currently unknown how this unique motility program is imprinted in SNG  $T_{RM}$  and whether it is shared  
 494 by tissue-resident cells from other exocrine glands.

495 Adhesion-free motility in 2D conditions has been proposed for large, blebbing carcinoma cells, based on  
 496 friction mediated by a large interface between migrating cells and substrates (69). We show that 2D  
 497 confinement suffices to induce  $T_{RM}$  motility through cation-dependent friction, since these cells become  
 498 unable to translocate their cell bodies in presence of EDTA. Friction is composed of multiple nanoscale forces  
 499 between two interfaces. For instance, electrostatic and van der Waals forces have been implicated in cell  
 500 migration and non-specific adherence to substrate (63, 70, 71). As chelation of bivalent cations reduced  
 501 friction below a threshold for cell translocation in our setting, electrostatic forces are likely to be relevant. In  
 502 principle, cells may compensate for a lower friction by increasing the contacting surface area (72). However,  
 503 lymphocytes are likely too small to generate a sufficiently large interface under these conditions. In turn,  $T_{RM}$   
 504 regained the capability to translocate in presence of EDTA when narrow spaces are created by immotile  
 505 neighboring cells or beads that lack strong adhesion to each other. This motility mode correlated with



continuous changes in cell shapes owing to the intrinsic protrusion formation capacity of  $T_{RM}$ . Thus,  $T_{RM}$  continuously formed multiple simultaneous protrusions that probed the environment, leading to their insertion into permissive gaps and subsequent cell body translocation. How  $T_{RM}$  protrusions generated tractive force for cell translocation under these conditions remains incompletely understood. One possibility is that protrusions insert into gaps of the 3D environment akin to cogs of a cogwheel and transmit the necessary force for translocation through retrograde actin flow along irregularly shaped surfaces, even in the absence of adhesion receptors. In fact, this translocation mode is reminiscent of the “squeezing and flowing” mechanism proposed for DCs (73), although SMG  $T_{RM}$  do not require a chemokine gradient for displacement. We also observed that  $T_{RM}$  avoided areas of high bead density, thus choosing the path of least resistance in this mode.

The efferocytic function of tissue macrophages conceivably requires physical contact with surrounding cells to detect and phagocytose senescent or infected cells. Since salivary gland macrophages do not form continuous tight and adherens junctions with neighboring cells (48), these cells may create a path of least resistance for patrolling  $T_{RM}$ . We speculate that the flexible anchorage of macrophage protrusions between epithelial cells may facilitate the insertion of F-actin-rich pseudopods by  $T_{RM}$  before squeezing of the nucleus as biggest organelle (40, 42, 74).  $T_{RM}$  migration along macrophages may be further assisted by unknown adhesion receptors or other molecular interactions between these cells. In any event, the non-proteolytic path finding is beneficial to preserve the integrity of the target tissue, as it does not require constant repair of newly generated discontinuities in the ECM (75). The scanning strategy adopted by  $T_{RM}$  resembles the migration pattern of T cell blasts in 3D collagen networks, where these cells routinely bypass dense collagen areas, while probing the environment for permissive gaps for cell body translocation (76). In fact, leukocytes have recently been shown to use the nucleus to identify the path of least resistance in complex 3D environments with different pore sizes (64). This migration mode preserves tissue integrity is energetically favorable by avoiding ECM degradation.

Reflecting the multiple functions of tissue macrophages, depletion studies make the interpretation of the physiological function of macrophage-assisted  $T_{RM}$  surveillance of SMG experimentally difficult to dissect. As example, when we locally infected macrophage-depleted SMG with MCMV, we observed massively increased

533 numbers of viral foci as compared to control SMG owing to a lack of efferocytosis. Our local CXCL10  
534 deposition experiment in combination with impaired recruitment of circulating T cells suggests that  
535 macrophages facilitate local  $T_{RM}$  accumulation at sites where inflammatory chemokines are produced. This  
536 resembles observations made in skin infection models where CXCR3 promotes  $CD8^+$  T cell accumulation at  
537 sites of viral replication necessary for efficient elimination of infected cells (21, 77). A recent study by Förster  
538 and colleagues has uncovered an unexpectedly low killing rate of cytotoxic T cells against viral-infected  
539 stromal cells (78). Thus, effective stromal cell elimination requires cooperativity through repeated cytotoxic  
540 attacks by multiple  $CD8^+$  T cells. Conceivably, the promigratory accessory function of tissue macrophages  
541 described here helps to cluster a quorum of  $T_{RM}$  for successful stromal cell killing. Furthermore, unlike the  
542 monoclonal  $T_{RM}$  population created in our experimental setting, not all  $T_{RM}$  recognize the same pathogen  
543 under physiological conditions. This might impose a requirement for T cells to scan local sites of pathogen  
544 re-emergence and to form clusters for timely elimination of fast-replicating microbes.

545 In sum, our data assign a previously unnoticed interplay between tissue-resident innate and adaptive  
546 immune cell populations. These findings further suggest a noticeable capacity of SMG  $T_{RM}$  to integrate a  
547 continuum of intrinsic and external signals, friction and 3D structures for efficient motility, providing these  
548 cells with maximal flexibility for NLT surveillance. We propose that such a mode of tissue patrolling is ideally  
549 adapted to the arborized epithelial architecture of exocrine glands by permitting homeostatic surveillance  
550 while maintaining responsiveness to local inflammatory cues.

## 551 **Materials and Methods**

### 552 *Mice*

553 OT-I TCR (34) and P14 TCR transgenic mice (36) were backcrossed to Tg(UBC-GFP)30Scha “Ubi-GFP” (79) or  
 554 hCD2-dsRed (80) mice. Ubi-GFP (GFP<sup>+</sup>) OT-I mice backcrossed to CXCR3<sup>-/-</sup> mice have been described (81).  
 555 Tg(Itgax-Venus)1Mnz CD11c-YFP (82) and Tg(Itgax-DTR/EGFP)57Lan CD11c-DTR mice were used as recipients  
 556 or bone marrow donors for lethally irradiated C57BL/6 or Ubi-GFP mice. C57BL/6 mice were purchased from  
 557 Janvier (AD Horst). All mice were maintained at the Department of Clinical Research animal facility of the  
 558 University of Bern, at the Theodor Kocher Institute and the University of Fribourg. All animal work has been  
 559 approved by the Cantonal Committees for Animal Experimentation and conducted according to federal  
 560 guidelines.

561

### 562 *T cell transfer and viral infections*

563 CD8<sup>+</sup> T cells were negatively isolated from spleen, peripheral and mesenteric lymph nodes of GFP<sup>+</sup> or dsRed<sup>+</sup>  
 564 OT-I or GFP<sup>+</sup> P14 mice, using the EasySep™ Mouse CD8<sup>+</sup> T cell Isolation Kit (Stem Cell Technologies). CD8<sup>+</sup> T  
 565 cell purity was confirmed to be > 95% by flow cytometry prior to cell transfer. 10<sup>4</sup> OT-I T cells were i.v.  
 566 transferred into recipient mice 24 h before i.p. infection with 10<sup>5</sup> pfu LCMV-OVA (33). Experimental read-  
 567 outs for the acute, cleared and memory phase of viral infection were performed 6, 15 and ≥ 30 days p.i.,  
 568 respectively.

569

### 570 *LCMV virus titer*

571 C57BL/6 mice were infected i.p. with 10<sup>5</sup> pfu LCMV-OVA and sacrificed 3 or 5 days later. PLN, spleens and  
 572 SMG were harvested and organs were snap frozen in liquid nitrogen. Recombinant LCMV-OVA infectivity was  
 573 measured by immunofocus assay on MC57 cells as previously described <sup>96</sup>.

574

### 575 *Antibodies and reagents*

576 Alexa633-conjugated anti-PNAd MECA79, αL-integrin FD441.8 and anti-α4-integrin PS/2 mAbs were from  
 577 nanotools (Freiburg, Germany). Anti-α1-integrin Ha31/8 was from BD Bioscience, anti-α4 integrin PS/2 and

578 anti- $\alpha$ E integrin M290 were from BioXCell, anti- $\alpha$ V integrin RMV-7 was from BioLegend, and anti-Mac1 mAb  
 579 M1/70 was purified from hybridoma supernatant. TexasRed-Dextran 70 kDa was from Molecular Probes.  
 580 Cascade Blue (MW 10 kDa) was purchased from Invitrogen. TRITC-Dextran (MW 70 kDa) and Diphtheria Toxin  
 581 whereas purchased from Sigma. Pertussis toxin (PTx) and enzymatically inactive mutant PTx (PTx<sub>mut</sub>) were  
 582 obtained from List Biological Laboratories. Sodium Pyruvate (100 mM; #11360-039), HEPES buffer (1M;  
 583 #15630-056), Minimum essential Medium Non-essential amino acids (MEM NEAA, #11140-035), L-Glutamine  
 584 (200 mM; #25030-024), PenStrep (#15140-122) and RPMI-1640 (#21875-034) were purchased from Gibco  
 585 and Fetal Bovine Serum (FCS, #SV30143.03) was purchased from HyClone.

586

# 587 *Flow cytometry analysis*

588 PLN and spleen were harvested at the indicated time points and single cell suspensions were obtained by  
 589 passing organs through cell strainers (70  $\mu$ m; Bioswistec). Red blood cell lysis was performed on splenocytes  
 590 in some experiments. For analysis of SMG and LG, organs were minced and treated with 2 U/ $\mu$ l collagenase  
 591 II (Worthington Biochem), 2 U/ $\mu$ l bovine DNase I (Calbiochem) and - only for intracellular stainings of  
 592 cytokines – 5  $\mu$ g/ml Brefeldin A (B6542, Sigma-Aldrich) in CMR (RPMI/10% FCS/1% HEPES/1% PenStrep/2  
 593 mM L-Glutamine/1 mM Sodium Pyruvate) for 30 min at 37°C, passed through a 70  $\mu$ m cell strainer and  
 594 washed with PBS/5 mM EDTA. We used following reagents for flow cytometry:

| Antibody              | clone    | company        | Order number |
|-----------------------|----------|----------------|--------------|
| anti-CD3-APC          | 145-2C11 | Biolegend      | 100312       |
| anti-CD8a-PE          | 53-6.7   | BD Biosciences | 553033       |
| anti-CD8a-PerCP       | 53-6.7   | Biolegend      | 100732       |
| anti-CD8a-APC/Fire750 | 53-6.7   | Biolegend      | 100766       |
| anti-CD11a-PE         | M17/4    | Biolegend      | 101107       |
| anti-CD11b-PE         | M1/70    | BD Biosciences | 553311       |
| anti-CD11c-APC        | HL3      | BD Biosciences | 550261       |
| anti-CD18-PE          | M18/2    | Biolegend      | 101407       |

|                         |          |                  |          |
|-------------------------|----------|------------------|----------|
| anti-CD29-PE            | HMβ1-1   | Biolegend        | 102207   |
| anti-CD44-PE            | IM7      | BD Biosciences   | 553134   |
| anti-CD45-PerCP         | 30-F11   | BD Bioscience    | 557235   |
| anti-CD45-BV711         | 30-F11   | Biolegend        | 103147   |
| anti-CD45.1-AF488       | A20      | Biolegend        | 110718   |
| anti-CD45R/B220-APC     | RA3-6B2  | Biolegend        | 103212   |
| anti-CD49a-PE           | HMα1     | Biolegend        | 142603   |
| anti-CD49b-Biotin       | DX5      | Biolegend        | 108903   |
| anti-CD49d-PE           | PS/2     | Southern Biotech | 1520-09L |
| anti-CD51-PE            | RMV-7    | Biolegend        | 104105   |
| anti-CD64-AF647         | X54-517  | BD Bioscience    | 558539   |
| anti-CD69-PE            | H1.2F3   | Biolegend        | 104508   |
| anti-CD103-APC          | 2E7      | Biolegend        | 121414   |
| anti-CD103-Biotin       | M290     | BD Bioscience    | 557493   |
| anti-β7-integrin-Biotin | FIB504   | Biolegend        | 321209   |
| anti-F4/80-FITC         | BM8      | Biolegend        | 123108   |
| anti-F4/80-APC          | BM8      | Biolegend        | 123116   |
| anti-KLRG1-PE           | 2F1      | BD Bioscience    | 561621   |
| anti-KLRG-1-PE-Cy7      | 2F1      | Biolegend        | 138415   |
| anti-KLRG1-APC          | 2F1      | Biolegend        | 138411   |
| anti-NK1.1-APC          | PK136    | Biolegend        | 108710   |
| anti-Siglec-F-PE        | E50-2440 | BD Bioscience    | 562068   |
| Streptavidin-APC        | -        | Biolegend        | 405207   |
| anti-rat IgG1 K-APC     | -        | Biolegend        | 400412   |
| armenian hamster IgG-PE | -        | Biolegend        | 400907   |

595 Single cell suspensions were stained for surface antigens on ice for 30 min with the indicated antibodies and  
596 washed in FACS buffer (FB; PBS/2% FCS/1 mM EDTA) or FB with 5 µg/ml Brefeldin A for intracellular cytokine

597 stainings. All sample were washed in FB after staining, and for intracellular stainings, cells were permeabilized  
 598 and fixed in Cytofix/Cytoperm (#51-2090KZ, BD Biosciences) for 20 min on ice. Fixative was removed by  
 599 washing with Perm/Wash buffer (#51-2091KZ, BD Biosciences) and subsequent intracellular staining steps  
 600 were performed in Perm/Wash buffer. Cells were washed again prior to acquisition and at least  $10^5$  cells in  
 601 the lymphocyte FSC/SSC gate were acquired using a FACSCalibur (BD Bioscience), LSR II (BD Bioscience), LSR  
 602 II SORP Upgrade (BD Bioscience) or Attune NxT Flow cytometer (ThermoFisher). Total cell counts were  
 603 obtained by measuring single cell suspensions in PKH26 reference microbeads (Sigma) for 1 min at high  
 604 speed. Gating for CD103<sup>+</sup> and KLRG1<sup>+</sup> was set according to isotype controls. For CD69 staining, positive and  
 605 negative gates were set according to distinguishable populations and FMO was subtracted from the final %  
 606 of CD69<sup>+</sup> cells as background.

607

# 608 *Immunofluorescence*

609 Mice were anesthetized with i.p. injection of ketamine and xylazine and perfused with ice-cold 1% PFA.  
 610 Organs were harvested and fixed overnight in 2% PFA prior to embedding in TissueTek O.C.T. compound  
 611 (Sakura) for cryostat sectioning or 5% low-melting-point agarose (Sigma) for vibratome (Microslicer™ DTK-  
 612 1000) sectioning. 6 µm-thick frozen cryostat sections were permeabilized, blocked and stained with 0.05%  
 613 Triton-X 100 in 5% skimmed milk or 0.05% Tween 20 and 3% BSA for 1h, washed 3 times with PBS/1%  
 614 BSA/0.05% Tween (TBPBS) and stained with goat-anti-Iba1 1/200 (ab5076, Abcam) and anti-phosphotyrosine  
 615 (pTyr) (ab179530, Abcam) for 2 h at RT prior to mounting with Fluoromount-G (Electron Microscopy  
 616 Sciences).

617 For vibratome sections, 100 µm-thick section were collected in a 48-well plate and blocked with TBPBS for 2  
 618 h, then blocked with F<sub>c</sub>-block o.n. at 4°C (hybridoma supernatant; 2.4 mg/ml diluted 1/800 in TBPBS). After  
 619 washing once with TBPBS for 1 h, sections were stained in TBPBS for 2-3 days at 4°C (in 100 µl, 3 sections per  
 620 well) with Alexa647-conjugated anti-EpCAM (1/160 dilution; clone G8.8, 118212, Biolegend), eFluor660-  
 621 conjugated anti-E-cadherin (1/200 dilution; clone DECMA-1, 50-3249-1633, eBioscience), polyclonal rabbit  
 622 anti-Laminin (1/1000 dilution; Z0097, Dako) or Cy3-conjugated anti-α-smooth muscle cell actin (clone 1A4,  
 623 C6198, Sigma). Sections were washed 3 times for 1 h with TBPBS and incubated with secondary Cy3-

conjugated anti-rabbit Ig (1/400 in TBPBS; 111-165-144, Jackson Immune Research), then washed 3 times 1 h with TBPBS and one time with PBS. Images were acquired with a Zeiss LSM510 or Leica SP5 confocal microscope and processed using Adobe Photoshop CS6 and Imaris 8.4.1. We used Imaris software for surface rendering and channel masking function to separate fluorophores with close emission spectra (i.e. GFP and YFP).

### *2PM image acquisition and analysis*

2PM intravital imaging of the popliteal lymph node was performed as described (83). In brief, mice were anesthetized with ketamine/xylazine/acepromazine. The right popliteal lymph node was surgically exposed. Prior to recording, Alexa 633-conjugated MECA-79 (10 µg/mouse) was injected i.v. to label HEV. 2PM was performed with an Olympus BX50WI microscope equipped with a 20X Olympus (NA 0.95) or 25X Nikon (NA 1.0) objective and a TrimScope 2PM system controlled by ImSpector software (LaVisionBiotec). Some of the image series were acquired using an automated system for real-time correction of tissue drift (84). For 2-photon excitation, a Ti:sapphire laser (Mai Tai HP) was tuned to 780 or 840 nm. For 4-dimensional analysis of cell migration, 11 to 20 x-y sections with z-spacing of 2-4 µm (22-64 µm depth) were acquired every 20 s for 20-60 min; the field of view was 150-350 x 150-350 µm. Emitted light and second harmonic signals were detected through 447/55-nm, 525/50-nm, 593/40-nm and 655/40-nm bandpass filters with non-descanned detectors in case of C57BL/6 recipient mice. For CD11c-YFP<sup>+</sup> recipient mice or bone marrow chimera, we used 447/55-nm, 513/20-nm, 543/30-nm and 624/30-nm bandpass filters.

For imaging of the SMG, neck and thorax of the mouse were shaved, and residual hair removed with hair removal cream (Veet). Subsequently, the animal was fixed on its back onto a custom-built SMG imaging stage and stereotactic holders were attached to the head for stabilization. A 10 x 5 mm piece of skin on the right side of the neck was excised to expose the right SMG lobe, which was micro-surgically loosened from surrounding tissue. The right SMG lobe was flipped to the right and gently immobilized in between 2 cover glasses to minimize motion artifacts from heartbeat and breathing. During the whole operation and imaging procedure tissue was kept moist. During imaging, the temperature at the SMG was monitored and kept at 37°C by a heating ring. In most experiments, mice were operated twice (for PLN and SMG) in alternating

651 order to directly compare behavior of cells in different organs of the same recipient. Prior to imaging, blood  
652 vessels were labeled by i.v. injection of 400 – 600  $\mu$ g of 10 kDa Cascade-blue dextran or 70 kDa TexasRed  
653 Dextran. Surgical exposure of the LG was essentially performed as for the SMG, with the mouse fixed on its  
654 left flank onto the custom-built SMG imaging stage and a 10 x 5 mm piece of skin excised between the right  
655 ear and eye of the mouse.

656 Sequences of image stacks were transformed into volume-rendered four-dimensional videos with Volocity  
657 6.0 or Imaris 6.00-9.00 (Bitplane), which was also used for semi-automated tracking of cell motility in three  
658 dimensions. Drift in image sequences was corrected using a MATLAB script recognizing 3D movement in a  
659 reference channel or by using the correct drift function of Imaris. Since our filter set up does not allow  
660 complete separation of GFP and YFP signals, we performed spectral unmixing of GFP and YFP using the Image  
661 J plugin “Spectral\_Unmixing” from Joachim Walter. Cellular motility parameters were calculated from x, y,  
662 and z coordinates of cell centroids using Volocity, Imaris and MATLAB protocols. The motility coefficient, a  
663 measure of the ability of a cell to move away from its starting position, was calculated from the gradient of  
664 a graph of mean displacement against the square root of time. We defined U-turns as the steepest turn over  
665 five steps of a track, if it is over more than 166 degrees and has a skew line distance between the first and  
666 last step smaller than one mean step of the respective track (**Fig. 7D**) to exclude continuous turns. The given  
667 binomial proportion 95% confidence intervals are Wilson Score intervals. We generated 100 synthetic tracks  
668 of 12 h duration for each condition using a sampling strategy, which was designed to preserve the correlation  
669 between velocity and turning angle and the autocorrelation of velocity and turning angle (10). We then took  
670 the first timestep further than 40  $\mu$ m away from the origin of each track as simulated dwelling time in an  
671 acinus of 80  $\mu$ m diameter. These analyses were performed using scientific computing packages for Python.  
672 For the image series depicted in the Figures, raw 2PM data was filtered with a fine median filter (3x3x1), and  
673 brightness and contrast were adjusted. Shape factors were determined by rendering and tracking cells in  
674 Imaris, and manually excluding all cells that did not move along a horizontal axis. The signal from the filter  
675 cells was projected into a single z-slice and the shape-factor of the 2D image calculated with Volocity.

676

677 *In vivo inhibitor treatment*



678 Gai signaling by chemokines was blocked as described previously (45). Briefly, mice were treated with 3 µg  
 679 PTx or PTx<sub>mut</sub> by i.p. injection 3 h prior to imaging. For depletion of CD11c-positive cells in CD11c-DTR mice  
 680 or BM chimera, 4 ng/g Diphtheria Toxin (DTx) was i.p. injected 24 h prior to imaging. Depletion efficiency of  
 681 CD11c<sup>+</sup> cells was determined by flow cytometry and was above 98% in all organs analyzed. For the  
 682 synchronous blocking of integrins, 100 µg each of the purified mAbs M290, FD441.8, M1/70 and PS/2 were  
 683 injected i.v. 16 h prior to imaging. Surface saturation of blocking mAbs in PLN and SMG suspensions was  
 684 determined at the end of the experiment by sample staining with or without the same mAb clones used for  
 685 blocking, followed by a fluorescently labeled secondary mAb and flow cytometry. RGD peptide or as control  
 686 GRADSP (RAD) peptide (SIGMA) was injected via Wharton's duct cannulation (approximately 600 nmol of  
 687 either peptide in 30 µl per lobe in PBS), as described previously (43). For this procedure, mice were  
 688 anesthetized with ketamine/xylazine and their upper incisors rested on a metal rod and the lower incisors  
 689 pulled down with string, which kept the mouth open. With the aid of a stereomicroscope, we located the  
 690 orifice of the Wharton's duct in the sublingual caruncle and inserted a pointed glass-capillary (Untreated  
 691 Fused Silica Tubing - L × I.D. 3 m × 0.10 mm, #25715, Sigma). The glass capillary was connected to a Hamilton  
 692 Micro-syringe (Hamilton) via fine bore polythene tubing (0.28 mm, #800/100/100, Smiths), which allowed  
 693 the injection of small volumes. For inhibition of MMPs, Marimastat (#S7156) was obtained from Selleck  
 694 and diluted in PBS/10% DMSO (0.2 mg/g) or the corresponding volume of PBS/10% DMSO was injected i.p.  
 695 90 min before starting imaging (46). OVA<sub>257-264</sub> (#BAP-201) and gp<sub>33-41</sub> (#BAP-206) peptides were obtained  
 696 from ECM microcollections and 200 µg/100 µl saline injected i.v. immediately prior to imaging or 6 - 12 h  
 697 prior to organ harvest for FACS staining.

698

#### 699 *Viral infection via Wharton's duct cannulation*

700 Wharton's duct cannulation was prepared as described above. Approximately 12500 pfu MCMV-  
 701 OVA<sub>mCherry</sub> (85) were injected into the Wharton's duct (WD) of DTx-treated CD11c-DTR or CD11c-YFP mice  
 702 in memory phase of LCMV-OVA infection. Mice were euthanized 48 h post infection and SMG tissue fixed in  
 703 4% PFA at 4°C for 12 h.

704

## 705 *Under agarose assays*

706 T<sub>N</sub> were isolated from spleen and PLN of a naive mouse using CD8<sup>+</sup> T cell isolation kit from Stemcell. SMG-  
707 derived macrophages were isolated from uninfected CD11c-YFP mice and sorted for CD11c-YFP<sup>+</sup> cells. T<sub>RM</sub>  
708 and T<sub>CM</sub> were isolated from SMG and PLN respectively of > 30 d LCMV-OVA-infected C57BL/6 mice. Single  
709 cells suspension of SMG and PLN were stained with APC-conjugated anti-KLRG1 mAb and sorted for GFP<sup>+</sup> or  
710 DsRED<sup>+</sup> KLRG1<sup>-</sup> T<sub>RM</sub> and T<sub>PLN-M</sub>, respectively. A 17-mm diameter circle was cut into the center of 60-mm dishes.  
711 The hole was sealed from the bottom part of the dish using aquarium silicone (Marina) and a 24-mm glass  
712 coverslip. After the silicone dried, we overlaid a 5 mm-high ring cut from a 15-ml falcon tube and sealed the  
713 borders with low melting point paraffin. Coverslips were washed with PBS and coated with 3% human serum  
714 albumin (HSA; A1653, Sigma) o.n. at 4°C or for 3 h at 37°C. In some experiments, coverslips were coated with  
715 10 µg/ml fibronectin (11080938001, Roche315-02, PeproTech). Fresh medium was added every 2 days and  
716 macrophages were cultured for 6-7 days. For naïve T cell migration, coverslips were coated with 20 µg/ml  
717 Protein A (6500-10, BioVision) for 1 h at 37°C, washed 3 times with PBS and blocked with 1.5 % BSA for 2 h  
718 at 37°C or o.n. at 4°C. After washing once with PBS, cover glasses were coated for 2 h at 37°C with 100 nM  
719 recombinant ICAM1-F<sub>C</sub> (796IC, R&D Systems) and washed 2 times with PBS. Five ml of 2 x HBSS and 10 ml of  
720 2 x RPMI containing 1% HSA for T<sub>RM</sub> and T<sub>CM</sub> and 20% FBS for macrophage and naïve T cell experiments, were  
721 mixed and heated in a water bath to 56°C. Golden agarose (100 mg; 50152, Lonza) was dissolved and heated  
722 in 5 ml distilled water before adding to the prewarmed medium to give a 1% agarose mix. After cooling to  
723 37°C, 500 µl of the agarose mix was added on top of the coverslip. In some cases, inhibitors were added (200  
724 µg/ml PTx, 5 µg/ml anti-Mac1 mAb, 10 µM RGD or GRADSP, 2.5 mM EDTA, or 5 µg/ml Hoechst (H21492,  
725 Invitrogen). After incubation for 30 min at 4°C, the dish was warmed up to 37°C before adding 1 ml of PBS  
726 outside the ring to prevent agarose drying. We punched a sink hole (diameter approximately 2 mm) at the  
727 side of the agarose. Sorted T cell populations were suspended in RPMI/0.5% HSA and in some cases treated  
728 with 5 µg anti-Mac1, 10 µM RGD or GRADSP, and pelleted in an Eppendorf tube. Cells were resuspended in  
729 the smallest possible achievable volume (ca. 5-10 µl) and 0.3 µl were injected in the opposite side from the  
730 sink hole using a 2.5-µl Eppendorf pipette. In some experiments, polystyrene beads (Sigma-Aldrich, LB30 or  
731 78462) were co-injected with the cells. From the sink hole surplus of medium was collected to confine cells

between the agarose and the glass slide. Time-lapse images were taken from the center of the dish using a Zeiss fluorescent microscope (AxioObserver, Zeiss).

### *Correlative Confocal and Transmission Electron Microscopy*

Correlative confocal and transmission electron microscopy (TEM) was carried out as described (86). Briefly, CD11c-YFP mice were perfused with PBS and SMG were fixed *in situ* by left ventricle injection of 1.5% glutaraldehyde/2% PFA in 0.1 M sodium cacodylate buffer (pH 7.4). SMG were harvested and immersed in the same solution for 16 h. Fixed samples were cryoprotected in 30% sucrose prior to embedding in OCT and freezing. Thirty  $\mu\text{m}$  sections were cut with a CM1520 cryostat (Leica) and collected on Superfrost Plus slides (Thermo Fisher Scientific). Sections were processed for confocal imaging using PBS as mounting medium to prevent dehydration. After confocal image acquisition, the coverslips were gently removed and sections adherent to the slide were processed for TEM as described (86). Briefly, sections were postfixed using the ferrocyanide-reduced osmium-thiocarbohydrazide-osmium (R-OTO) procedure, *en bloc* stained in 1% uranyl acetate and dehydrated through increasing concentration of ethanol. Finally, sections were embedded by overlaying a BEEM capsule filled with Epoxy resin. The BEEM capsules containing the embedded sections were detached by immersing the slides in liquid nitrogen, leaving the section facing up on the resin block. The specimens were mounted on a Leica Ultracut UCT and 70-90 nm thick serial sections were collected on formvar-coated copper slot grids and imaged with a ZEISS Leo912AB Omega fitted with a 2k  $\times$  2k bottom-mounted slow-scan Proscan camera controlled by the EsivisionPro 3.2 software. Using the florescent confocal and bright field images, the same areas were relocated in the electron microscope and several images were acquired through the different serial section. Acquired TEM images were then aligned and overlaid with the confocal images by means of the eC-CLEM Icy plugin (87).

### *Super-resolution shadow imaging (SUSHI)*

After euthanizing mice with CO<sub>2</sub>, submandibular salivary glands (SMG) were isolated from 8-11 weeks old C57BL6 or CD11c-YFP mice and submerged in ice-cold PBS. SMG were embedded in 4% low gelling agarose (Sigma), cut in 300  $\mu\text{m}$ -thick transversal slices and submerged in cold complete RPMI medium containing:

10% FCS (Hyclone). Slices were left to recover at room temperature for 15-30 min before entering the imaging chamber of a custom-built 3D-STED microscopy setup (47). First, the positively labelled (YFP) macrophages were identified at a depth of 20-30  $\mu\text{m}$  below the surface and imaged in STED mode (excitation 485 nm, depletion 597 nm, objective HC PL APO 63X/1.30 NA, Leica) with the following acquisition parameters: field of view: 200  $\mu\text{m}$  X 200  $\mu\text{m}$ ; pixel size: 48 nm X 48 nm; pixel dwell time: 30  $\mu\text{s}$ , frame acquisition time: 20 min. The medium was exchanged in the chamber with the complete RPMI containing 400  $\mu\text{M}$  Calcein dye, which was allowed for 20 - 30 min to disperse throughout the extracellular space of the tissue. Subsequently, we acquired a SUSHI image to identify a region of interest around the macrophages. We performed a hyperosmolar challenge by exchanging the chamber solution (300  $\mu\text{l}$ ) with high osmolar solution (350 mOsm/L), and acquired time lapse images to track changes in ECS topology with a 20-min interval between the image frames. All image analysis including morphological measurements were done on raw images using the "Plot Line Profile" function in ImageJ on structures of interest. Brightness and contrast were adjusted using the "Brightness and Contrast" function in ImageJ. It was applied for illustration purposes only and did not affect the quantitative analysis. No filtering or any other image processing was applied, other than inverting the look-up-tables (LUT). The YFP signal was used only to identify macrophages and was not recorded during subsequent imaging. Only unambiguously recognizable macrophages and ECS were analyzed. Image analysis was performed on SMG slices from two mice in two independent experiments.

776

#### 777 *Confocal imaging of the p-Tyr signal and quantification*

Mice were perfused with PBS containing 4% paraformaldehyde, SMG were isolated and fixed in the same solution at 4°C for 18 h, followed by at least 5 h dehydration in 30% sucrose. Glands were embedded in OCT (Tissue-Tek) and cut at a thickness of 6 and 20  $\mu\text{m}$  at the cryostat, flash dried and fixed with 4% PFA for 10 min at room temperature. Sections were permeabilized using 0.2% Triton X-100, blocked in 10% serum of the secondary antibody and 2% BSA containing PBS and stained with antibodies for 18 h at 4°C in the same solution, after being washed in PBS and mounted in Prolong Gold containing DAPI (Invitrogen, Carlsbad, CA). Fluorescence microscopy was performed using the LSM880 confocal microscopes with 40x oil (Plan-Apochromat 40x 1.3 Oil DIC M27) or 63x oil (Plan-Apochromat 63x 1.3 Oil DIC M27) objectives (Zeiss,

786 Oberkochen, Germany). All images were recorded using sequential excitation. The lack of spectral overlap  
787 was confirmed using single fluorescing specimens and antibody specificity via secondary controls.  
788 Macrophages were identified via iba-1 and the presence and location of p-Tyr signal was quantified in 7 fields  
789 of view using Imaris software. Brightness and contrast were adjusted for each image individually. Gaussian  
790 filters were applied using Imaris software.

791

#### 792 *Chemokine-driven $T_{RM}$ accumulation*

793 After 6 weeks of reconstitution with CD11c-YFP or CD11c-DTR BM, we transferred  $10^4$  GFP<sup>+</sup> OT-I T cells and  
794 infected the day after with  $10^5$  pfu LCMV-OVA. After  $\geq 30$  days p.i., mice were anesthetized one day after i.p.  
795 injection of DTx (4 ng/g) as for 2PM imaging. To block immigration of cells from blood, we treated mice with  
796 integrin blocking antibodies anti- $\alpha$ L (FD441.8) and anti- $\alpha$ 4 (PS/2) (each at 50  $\mu$ g/mouse; nanotools). SMG  
797 was surgically exposed. Using thin glass capillaries as for Wharton's duct injection, we injected 2  $\mu$ l of a 1:1  
798 mix of mCXCL10 (100  $\mu$ g/ml; R&D 466-CR-010) and Qdots<sub>655</sub> (0.16  $\mu$ M; Thermo Fisher Q2152MP), to obtain  
799 a final mCXCL10 amount of 0.5  $\mu$ g per site of injection. After 4 h, we sacrificed the mice and harvest the SMG  
800 for vibratome sectioning. Mosaic images were taken of 100  $\mu$ m-thick sections, and lobes with the highest  
801 Qdot signal were analyzed by transforming the 3D image into extended 2D image, using the Z-projection  
802 function of ImageJ.  $T_{RM}$  density in the surrounding area and injection area (defined as an octagon with 500  
803  $\mu$ m diameter) was calculated using Imaris 8.4.1.

804

#### 805 *Statistical analysis*

806 Two-tailed, unpaired Student's t-test, Mann-Whitney U-test, one-way ANOVA with Dunnett's multiple  
807 comparisons test, Kruskal-Wallis test, or a Wilcoxon rang test was used to determine statistical significance  
808 (Prism, GraphPad). Significance was set at  $p < 0.05$ .

## 809 **Acknowledgements**

810 We thank Dr. Marcus Thelen (IRB, Bellinzona) for support with confocal imaging. This work benefitted from  
811 optical setups of the Microscopy Imaging Center of the University of Bern and of the BioImaging platform of  
812 the University of Fribourg.

813

## 814 **Funding**

815 This work was funded by Swiss National Foundation (SNF) project grants 31003A\_135649, 31003A\_153457  
816 and 31003A\_172994 (to JVS), Leopoldina fellowship LPDS 2011-16 (to BS) and SFB1129 (to BS and OTF), and  
817 the Novartis foundation fellowship 16C193 (to FT). PG and JS acknowledge support of the Spanish Ministry  
818 of Economy and Competitiveness, “Centro de Excelencia Severo Ochoa 2013-2017” and support of the CERCA  
819 Programme/Generalitat de Catalunya.

820

## 821 **Author contributions**

822 BS, FT and XF performed most experiments with support by LMA and NR. LMA and KI carried out SUSHI  
823 imaging under supervision of UVN. PG carried out computational analysis under supervision of JS. AR and FM  
824 performed correlative electron microscopy of SMG sections under supervision of MI. NP, KAK, FB, DM and  
825 OTF provided vital material and support. SMSF, MSD and CS analyzed human SMG sections. BS, FT, XF and  
826 JVS designed experiments and wrote the manuscript with input from all coauthors.

827

## 828 **Competing interests**

829 The authors declare no competing interests.

## 830 References

- 831 1. R. N. Germain, M. J. Miller, M. L. Dustin, M. C. Nussenzweig, Dynamic imaging of the immune  
832 system: progress, pitfalls and promise. *Nature Publishing Group*. **6**, 497–507 (2006).
- 833 2. C. Sumen, T. R. Mempel, I. B. Mazo, U. H. von Andrian, Intravital microscopy: visualizing immunity in  
834 context. *Immunity*. **21**, 315–329 (2004).
- 835 3. B. Breart, P. Bousso, Cellular orchestration of T cell priming in lymph nodes. *Current Opinion in*  
836 *Immunology*. **18**, 483–490 (2006).
- 837 4. P. Friedl, B. Weigelin, Interstitial leukocyte migration and immune function. *Nat Immunol*. **9**, 960–  
838 969 (2008).
- 839 5. M. Bajénoff *et al.*, Highways, byways and breadcrumbs: directing lymphocyte traffic in the lymph  
840 node. *Trends in Immunology*. **28**, 346–352 (2007).
- 841 6. T. Katakai, K. Habiro, T. Kinashi, Dendritic Cells Regulate High-Speed Interstitial T Cell Migration in  
842 the Lymph Node via LFA-1/ICAM-1. *J. Immunol*. **191**, 1188–1199 (2013).
- 843 7. M. Lee, J. N. Mandl, R. N. Germain, A. J. Yates, The race for the prize: T-cell trafficking strategies for  
844 optimal surveillance. *Blood*. **120**, 1432–1438 (2012).
- 845 8. G. Bogle, P. R. Dunbar, Agent-based simulation of T-cell activation and proliferation within a lymph  
846 node. *Immunol Cell Biol*. **88**, 172–179 (2009).
- 847 9. J. Textor *et al.*, Random Migration and Signal Integration Promote Rapid and Robust T Cell  
848 Recruitment. *PLoS Comput Biol*. **10**, e1003752–16 (2014).
- 849 10. M. Ackerknecht *et al.*, Antigen Availability and DOCK2-Driven Motility Govern CD4+ T Cell  
850 Interactions with Dendritic Cells In Vivo. *The Journal of Immunology*. **199**, 520–530 (2017).
- 851 11. T. Okada, J. G. Cyster, CC chemokine receptor 7 contributes to Gi-dependent T cell motility in the  
852 lymph node. *J. Immunol*. **178**, 2973–2978 (2007).
- 853 12. T. Worbs, T. R. Mempel, J. Bölker, U. H. von Andrian, R. Förster, CCR7 ligands stimulate the  
854 intranodal motility of T lymphocytes in vivo. *J. Exp. Med*. **204**, 489–495 (2007).
- 855 13. F. Asperti-Boursin, E. Real, G. Bismuth, A. Trautmann, E. Donnadieu, CCR7 ligands control basal T cell  
856 motility within lymph node slices in a phosphoinositide 3-kinase-independent manner. *J. Exp. Med*.  
857 **204**, 1167–1179 (2007).
- 858 14. E. Woolf *et al.*, Lymph node chemokines promote sustained T lymphocyte motility without triggering  
859 stable integrin adhesiveness in the absence of shear forces. *Nat Immunol*. **8**, 1076–1085 (2007).
- 860 15. M. Hons *et al.*, Chemokines and integrins independently tune actin flow and substrate friction  
861 during intranodal migration of T cells. *Nat Immunol*. **19**, 606–616 (2018).
- 862 16. N. Iijima, A. Iwasaki, A local macrophage chemokine network sustains protective tissue-resident  
863 memory CD4 T cells. *Science*. **346**, 93–98 (2014).
- 864 17. J. M. Schenkel *et al.*, Resident memory CD8 T cells trigger protective innate and adaptive immune  
865 responses. *Science*. **346**, 98–101 (2014).
- 866 18. G. Stry *et al.*, A mucosal vaccine against Chlamydia trachomatis generates two waves of protective  
867 memory T cells. *Science*. **348**, aaa8205–aaa8205 (2015).



- 868 19. S. Ariotti *et al.*, Skin-resident memory CD8<sup>+</sup> T cells trigger a state of tissue-wide pathogen alert.  
869 *Science*. **346**, 101–105 (2014).
- 870 20. M. Kadoki *et al.*, Organism-Level Analysis of Vaccination Reveals Networks of Protection across  
871 Tissues. *Cell*, 1–38 (2017).
- 872 21. S. Ariotti *et al.*, Subtle CXCR3-Dependent Chemotaxis of CTLs within Infected Tissue Allows Efficient  
873 Target Localization. *The Journal of Immunology*. **195**, 5285–5295 (2015).
- 874 22. A. Zaid *et al.*, Persistence of skin-resident memory T cells within an epidermal niche. *Proc. Natl.*  
875 *Acad. Sci. U.S.A.* **111**, 5307–5312 (2014).
- 876 23. S. Ariotti *et al.*, Tissue-resident memory CD8<sup>+</sup> T cells continuously patrol skin epithelia to quickly  
877 recognize local antigen. *Proceedings of the National Academy of Sciences*. **109**, 19739–19744 (2012).
- 878 24. J. W. Griffith, C. L. Sokol, A. D. Luster, Chemokines and Chemokine Receptors: Positioning Cells for  
879 Host Defense and Immunity. *Annu Rev Immunol*. **32**, 659–702 (2014).
- 880 25. S. Halle, O. Halle, R. Förster, Mechanisms and Dynamics of T Cell-Mediated Cytotoxicity In Vivo.  
881 *Trends Immunol*. **38**, 432–443 (2017).
- 882 26. D. P. Hoytema van Konijnenburg, D. Mucida, Intraepithelial lymphocytes. *Curr Biol*. **27**, R737–R739  
883 (2017).
- 884 27. C. S. Miller *et al.*, High Prevalence of Multiple Human Herpesviruses in Saliva from Human  
885 Immunodeficiency Virus-Infected Persons in the Era of Highly Active Antiretroviral Therapy. *Journal*  
886 *of Clinical Microbiology*. **44**, 2409–2415 (2006).
- 887 28. Cannon MJ *et al.* Repeated measures study of weekly and daily cytomegalovirus shedding patterns  
888 in saliva and urine of healthy cytomegalovirus-seropositive children. *BMC Infect Dis* (2014) **14**:569.
- 889 29. J. T. Thom, S. M. Walton, N. Torti, A. Oxenius, Salivary gland resident APCs are Flt3L- and CCR2-  
890 independent macrophage-like cells incapable of cross-presentation. *Eur. J. Immunol*. **44**, 706–714  
891 (2013).
- 892 30. J. T. Thom, T. C. Weber, S. M. Walton, N. Torti, A. Oxenius, The Salivary Gland Acts as a Sink for  
893 Tissue-Resident Memory CD8<sup>+</sup> T Cells, Facilitating Protection from Local Cytomegalovirus Infection.  
894 *CellReports*, 1–13 (2015).
- 895 31. C. J. Smith, S. Caldeira-Dantas, H. Turula, C. M. Snyder, Murine CMV Infection Induces the  
896 Continuous Production of Mucosal Resident T Cells. *CellReports*, 1–13 (2015).
- 897 32. U. H. von Andrian, C. R. Mackay, T-cell function and migration. Two sides of the same coin. *New*  
898 *England Journal of Medicine*. **343**, 1020–1034 (2000).
- 899 33. S. M. Kallert *et al.*, Replicating viral vector platform exploits alarmin signals for potent CD8<sup>+</sup> T  
900 cell-mediated tumour immunotherapy. *Nat Commun*. **8**, 1–13 (2017).
- 901 34. K. A. Hogquist *et al.*, T cell receptor antagonist peptides induce positive selection. *Cell*. **76**, 17–27  
902 (1994).
- 903 35. E. M. Steinert *et al.*, Quantifying Memory CD8<sup>+</sup> T Cells Reveals Regionalization of  
904 Immunosurveillance. *Cell*. **161**, 737–749 (2015).
- 905 36. D. Brändle *et al.*, T cell development and repertoire of mice expressing a single T cell receptor alpha  
906 chain. *Eur J Immunol*. **25**, 2650–2655 (1995).



- 907 37. X. Ficht, F. Thelen, B. Stolp, J. V. Stein, Preparation of Murine Submandibular Salivary Gland for  
908 Upright Intravital Microscopy. *J Vis Exp*, 1–8 (2018).
- 909 38. E. L. Gautier *et al.*, Gene-expression profiles and transcriptional regulatory pathways that underlie  
910 the identity and diversity of mouse tissue macrophages. *Nat Immunol.* **13**, 1118–1128 (2012).
- 911 39. G. E. Davis, The Mac-1 and p150,95 beta 2 integrins bind denatured proteins to mediate leukocyte  
912 cell-substrate adhesion. *Exp Cell Res.* **200**, 242–252 (1992).
- 913 40. E. K. Paluch, I. M. Aspalter, M. Sixt, Focal Adhesion–Independent Cell Migration. *Annu. Rev. Cell Dev.*  
914 *Biol.* **32**, 469–490 (2016).
- 915 41. J. T. H. Mandeville, M. A. Lawson, F. R. Maxfield, Dynamic imaging of neutrophil migration in three  
916 dimensions: mechanical interactions between cells and matrix. *J Leukoc Biol.* **61**, 188–200 (1997).
- 917 42. S. Nourshargh, P. L. Hordijk, M. Sixt, Breaching multiple barriers: leukocyte motility through venular  
918 walls and the interstitium. *Nat Rev Mol Cell Biol.* **11**, 366–378 (2010).
- 919 43. M. Bombardieri *et al.*, Inducible Tertiary Lymphoid Structures, Autoimmunity, and Exocrine  
920 Dysfunction in a Novel Model of Salivary Gland Inflammation in C57BL/6 Mice. *J. Immunol.* **189**,  
921 3767–3776 (2012).
- 922 44. S. Woyciechowski, M. Hofmann, H. Pircher,  $\alpha$  4 $\beta$  1 integrin promotes accumulation of tissue-resident  
923 memory CD8 +T cells in salivary glands. *Eur. J. Immunol.* **47**, 244–250 (2016).
- 924 45. E. Russo *et al.*, Intralymphatic CCL21 Promotes Tissue Egress of Dendritic Cells through Afferent  
925 Lymphatic Vessels. *CellReports.* **14**, 1723–1734 (2016).
- 926 46. D. C. Marshall *et al.*, Selective Allosteric Inhibition of MMP9 Is Efficacious in Preclinical Models of  
927 Ulcerative Colitis and Colorectal Cancer. *PLoS ONE.* **10**, e0127063–26 (2015).
- 928 47. J. Tønnesen, V. V. G. K. Inavalli, U. V. Nägerl, Super-Resolution Imaging of the Extracellular Space in  
929 Living Brain Tissue. *Cell.* **172**, 1108–1121.e15 (2018).
- 930 48. A. Le, M. Saverin, A. R. Hand, Distribution of Dendritic Cells in Normal Human Salivary Glands. *Acta*  
931 *Histochem. Cytochem.* **44**, 165–173 (2011).
- 932 49. F. Ginhoux, S. Jung, Monocytes and macrophages: developmental pathways and tissue homeostasis.  
933 *Nat Rev Immunol.* **14**, 392–404 (2014).
- 934 50. S. Epelman, K. J. Lavine, G. J. Randolph, Origin and Functions of Tissue Macrophages. *Immunity.* **41**,  
935 21–35 (2014).
- 936 51. Y. Lavin, A. Mortha, A. Rahman, M. Merad, Regulation of macrophage development and function in  
937 peripheral tissues. *Nat Rev Immunol.* **15**, 731–744 (2015).
- 938 52. A. W. Roberts *et al.*, Tissue-Resident Macrophages Are Locally Programmed for Silent Clearance of  
939 Apoptotic Cells. *Immunity.* **47**, 913–927.e6 (2017).
- 940 53. F. R. Stahl *et al.*, Nodular Inflammatory Foci Are Sites of T Cell Priming and Control of Murine  
941 Cytomegalovirus Infection in the Neonatal Lung. *PLoS Pathog.* **9**, e1003828–18 (2013).
- 942 54. M. Baratin *et al.*, T Cell Zone Resident Macrophages Silently Dispose of Apoptotic Cells in the Lymph  
943 Node. *Immunity*, 1–20 (2017).

- 944 55. S. Uderhardt, A. J. Martins, J. S. Tsang, T. Lämmermann, R. N. Germain, Resident Macrophages Cloak  
945 Tissue Microlesions to Prevent Neutrophil-Driven Inflammatory Damage. *Cell*. **177**, 541–555.e17  
946 (2019).
- 947 56. Y. Natsuaki *et al.*, Perivascular leukocyte clusters are essential for efficient activation of effector T  
948 cells in the skin. *Nat Immunol*, 1–8 (2014).
- 949 57. K. W. Cho *et al.*, An MHC II-Dependent Activation Loop between Adipose Tissue Macrophages and  
950 CD4+ T Cells Controls Obesity-Induced Inflammation. *CellReports*. **9**, 605–617 (2014).
- 951 58. T. A. Wynn, A. Chawla, J. W. Pollard, Macrophage biology in development, homeostasis and disease.  
952 *Nature*. **496**, 445–455 (2013).
- 953 59. M. Hulsmans *et al.*, Macrophages Facilitate Electrical Conduction in the Heart. *Cell*. **169**, 510–  
954 513.e20 (2017).
- 955 60. A. Scholer, S. Hugues, A. Boissonnas, L. Fetler, S. Amigorena, Intercellular adhesion molecule-1-  
956 dependent stable interactions between T cells and dendritic cells determine CD8+ T cell memory.  
957 *Immunity*. **28**, 258–270 (2008).
- 958 61. Z. Haimon *et al.*, Re-evaluating microglia expression profiles using RiboTag and cell isolation  
959 strategies. *Nat Immunol*, 1–13 (2018).
- 960 62. P. Mrass *et al.*, CD44 Mediates Successful Interstitial Navigation by Killer T Cells and Enables Efficient  
961 Antitumor Immunity. *Immunity*. **29**, 971–985 (2008).
- 962 63. G. Charras, E. Sahai, Physical influences of the extracellular environment on cell migration. *Nat Rev*  
963 *Mol Cell Biol*. **15**, 813–824 (2014).
- 964 64. J. Renkawitz *et al.*, Nuclear positioning facilitates amoeboid migration along the path of least  
965 resistance. *Nature*. **568**, 546–550 (2019).
- 966 65. M. G. Overstreet *et al.*, Inflammation-induced interstitial migration of effector CD4+ T cells is  
967 dependent on integrin  $\alpha$ V. *Nat Immunol*. **14**, 949–958 (2013).
- 968 66. A. Zaid *et al.*, Chemokine Receptor-Dependent Control of Skin Tissue-Resident Memory T Cell  
969 Formation. *The Journal of Immunology*. **199**, 2451–2459 (2017).
- 970 67. Y.-J. Liu *et al.*, Confinement and Low Adhesion Induce Fast Amoeboid Migration of Slow  
971 Mesenchymal Cells. *Cell*. **160**, 659–672 (2015).
- 972 68. V. Ruprecht *et al.*, Cortical Contractility Triggers a Stochastic Switch to Fast Amoeboid Cell Motility.  
973 *Cell*. **160**, 673–685 (2015).
- 974 69. M. Bergert *et al.*, Force transmission during adhesion-independent migration. *Nat Cell Biol*. **17**, 524–  
975 529 (2015).
- 976 70. K. Kendall, A. D. Roberts, van der Waals forces influencing adhesion of cells. *Philosophical*  
977 *Transactions of the Royal Society B: Biological Sciences*. **370**, 20140078–20140078 (2014).
- 978 71. M. H. Lee, D. A. Brass, R. Morris, R. J. Composto, P. Ducheyne, The effect of non-specific interactions  
979 on cellular adhesion using model surfaces. *Biomaterials*. **26**, 1721–1730 (2005).
- 980 72. R. J. Hawkins *et al.*, Pushing off the Walls: A Mechanism of Cell Motility in Confinement. *Phys. Rev.*  
981 *Lett*. **102**, 1567–4 (2009).

- 982 73. T. Lämmermann *et al.*, Rapid leukocyte migration by integrin-independent flowing and squeezing.  
983 *Nature*. **453**, 51–55 (2008).
- 984 74. K. Wolf *et al.*, Physical limits of cell migration: Control by ECM space and nuclear deformation and  
985 tuning by proteolysis and traction force. *J Cell Biol.* **201**, 1069–1084 (2013).
- 986 75. R. G. Rowe, S. J. Weiss, Breaching the basement membrane: who, when and how? *Trends in Cell*  
987 *Biology*. **18**, 560–574 (2008).
- 988 76. K. Wolf, Amoeboid shape change and contact guidance: T-lymphocyte crawling through fibrillar  
989 collagen is independent of matrix remodeling by MMPs and other proteases. *Blood*. **102**, 3262–3269  
990 (2003).
- 991 77. H. D. Hickman *et al.*, CXCR3 chemokine receptor enables local CD8(+) T cell migration for the  
992 destruction of virus-infected cells. *Immunity*. **42**, 524–537 (2015).
- 993 78. S. Halle *et al.*, In Vivo Killing Capacity of Cytotoxic T Cells Is Limited and Involves Dynamic  
994 Interactions and T Cell Cooperativity. *Immunity*. **44**, 233–245 (2016).
- 995 79. B. C. Schaefer, M. L. Schaefer, J. W. Kappler, P. Marrack, R. M. Kedl, Observation of antigen-  
996 dependent CD8+ T-cell/ dendritic cell interactions in vivo. *Cell Immunol.* **214**, 110–122 (2001).
- 997 80. A. C. Kirby, M. C. Coles, P. M. Kaye, Alveolar Macrophages Transport Pathogens to Lung Draining  
998 Lymph Nodes. *J. Immunol.* **183**, 1983–1989 (2009).
- 999 81. A. J. Ozga *et al.*, pMHC affinity controls duration of CD8 +T cell–DC interactions and imprints timing  
1000 of effector differentiation versus expansion. *J. Exp. Med.* **213**, 2811–2829 (2016).
- 1001 82. R. L. Lindquist *et al.*, Visualizing dendritic cell networks in vivo. *Nat Immunol.* **5**, 1243–1250 (2004).
- 1002 83. B. Stolp *et al.*, HIV-1 Nef interferes with T-lymphocyte circulation through confined environments in  
1003 vivo. *Proceedings of the National Academy of Sciences*. **109**, 18541–18546 (2012).
- 1004 84. M. Vladymyrov, J. Abe, F. Moalli, J. V. Stein, A. Ariga, Real-time tissue offset correction system for  
1005 intravital multiphoton microscopy. *Journal of Immunological Methods*. **438**, 35–41 (2016).
- 1006 85. A. Marquardt *et al.*, Single cell detection of latent cytomegalovirus reactivation in host tissue.  
1007 *Journal of General Virology*. **92**, 1279–1291 (2011).
- 1008 86. L. G. Guidotti *et al.*, Immunosurveillance of the Liver by Intravascular Effector CD8+ T Cells. *Cell*. **161**,  
1009 486–500 (2015).
- 1010 87. P. Paul-Gilloteaux *et al.*, eC-CLEM: flexible multidimensional registration software for correlative  
1011 microscopies. *Nat Meth.* **14**, 102–103 (2017).

1012

## Figure legends

**Fig. 1. Dynamic motility parameters of memory CD8<sup>+</sup> T cells in PLN versus SMG.** **A.** Experimental layout for CD8<sup>+</sup> T cell analysis in SMG and PLN. **B.** Immunofluorescent sections of GFP<sup>+</sup> OT-I T cells in PLN and SMG in memory phase ( $\geq$  day 30 p.i.). Scale bar, 100  $\mu$ m (left panels) and 20  $\mu$ m (right panel). **C.** Time-lapse 2PM image sequences showing OT-I CD8<sup>+</sup> T<sub>PLN-M</sub> cell motility in PLN in memory phase ( $\geq$  day 30 p.i.). **D and E.** Time-lapse 2PM image sequences showing OT-I CD8<sup>+</sup> T<sub>RM</sub> cell motility in SMG in memory phase ( $\geq$  day 30 p.i.). Arrowheads indicate protrusions (**D**) and the arrow indicates squeezing behavior (**E**) of OT-I CD8<sup>+</sup> T<sub>RM</sub>. Scale bar in C-E, 10  $\mu$ m. Time in min:s. **F.** Time-coded shapes of exemplary T<sub>PLN-M</sub> and T<sub>RM</sub> tracks. **G.** Shape factor distribution of T<sub>PLN-M</sub> and T<sub>RM</sub> with exemplary cell shapes. **H.** Speed frequency distribution of OT-I CD8<sup>+</sup> T cells in PLN and SMG. Arrows indicate median values ( $\mu$ m/min). **I.** Arrest coefficient frequency distribution of OT-I CD8<sup>+</sup> T cells in PLN and SMG (cut-off < 2.5  $\mu$ m/min). **J.** Mean displacement versus time of OT-I T<sub>PLN-M</sub> (left) and T<sub>RM</sub> (right) before and after OVA<sub>257-264</sub> injection with motility coefficients ( $\mu$ m<sup>2</sup>/min). **K.** IFN- $\gamma$  expression in OT-I T<sub>PLN-M</sub> and T<sub>RM</sub> 24 h after OVA<sub>257-264</sub> injection (mean  $\pm$  SD). Data in G are from 2-3 independent experiments and 3 mice total for each group. Data in H and I are pooled from 5 to 6 mice from 4 independent experiments with at least 194 tracks analyzed per organ. Data in J are pooled of 3-4 mice from 2 independent experiments. Data in K show one of two independent experiments. Data in G and I were analyzed with Mann-Whitney-test and data in H with Student's t-test. \*\*\*, p < 0.001.

**Fig. 2. SMG T<sub>RM</sub> move alongside tissue macrophages.** **A.** Immunofluorescent section showing localization of SMG T<sub>RM</sub> adjacent to tissue macrophages (arrows). Scale bars, 1 mm (left), 100  $\mu$ m (middle) and 20  $\mu$ m (right). **B.** Percent of SMG T<sub>RM</sub> adjacent to tissue macrophages. Data are pooled from 105 FOV with a total of 3270 T<sub>RM</sub> and shown as box and whisker graph with 2.5 – 97.5 percentiles. **C.** Correlative light and electron microscopy sections (left; confocal image; middle and right, TEM image) showing close spatial association of SMG T<sub>RM</sub> and tissue macrophages. M, tissue macrophages; E, epithelial cell; ME, myoepithelial cell; ECM, extracellular matrix. Scale bar, 5 (left), 2 (middle) and 1  $\mu$ m (right). **D.** TEM images showing attachment of epithelial cells to ECM (top) and through intercellular junctions (white arrows; bottom). Scale bar, 800 nm. **E.** 2PM time-lapse image sequence showing overlap of OT-I T<sub>RM</sub> tracks with tissue macrophages in SMG in

memory phase ( $\geq$  day 30 p.i.). Scale bar, 20  $\mu$ m. Time in min:s. The right panels show the time accumulated overlays of images with or without OT-I  $T_{RM}$ . **F.** Immunofluorescent section of WT and CXCR3<sup>-/-</sup> OT-I T cells and macrophages. Magnified image shows association of CXCR3<sup>-/-</sup> OT-I  $T_{RM}$  to tissue macrophages (arrows). Scale bar, 100  $\mu$ m (left) and 20  $\mu$ m (right).

1044

**Fig. 3. Confinement induces SMG  $T_{RM}$  motility through chemokine- and adhesion-mediated signals and bivalent cation-dependent friction.** **A.** Experimental layout of under agarose assay. Arrows indicate F-actin flow. **B.** Representative  $T_N$  (n = 75) and  $T_{RM}$  (n = 58) tracks in presence of chemokine and ICAM-1. **C.** Speeds of  $T_N$  and  $T_{RM}$ . Data are presented as Tukey box and whiskers plot. **D.** Time-lapse image sequence showing  $T_{RM}$  motility among immotile  $T_N$ .  $T_{RM}$  displacement shown by segmented line. Scale bar, 20  $\mu$ m. Time in min:s. **E.** Time-lapse image sequence in under agarose plates coated with HSA showing  $T_{PLN-M}$  (top) and  $T_{RM}$  (bottom) motility. Cell displacement shown by segmented line. Scale bar, 10  $\mu$ m. Time in min:s. **F.** Representative  $T_N$  (n = 75),  $T_{PLN-M}$  (n = 226) and  $T_{RM}$  (n = 379) tracks. **G.**  $T_N$ ,  $T_{PLN-M}$  and  $T_{RM}$  speeds in under agarose plates coated with HSA. Numbers indicate percentage of tracks > 3  $\mu$ m/min (boxed). Lines indicate median. **H.** Meandering index of  $T_N$ ,  $T_{PLN-M}$  and  $T_{RM}$  tracks. **I.**  $T_{RM}$  speeds after treatment with PTx, RGD peptide, anti-Mac1 mAb, or in presence of EDTA. Numbers indicate percentage of tracks > 3  $\mu$ m/min (boxed). Lines indicate median. **J.** Image sequence of  $T_{RM}$  protrusions in presence of EDTA. Scale bar, 10  $\mu$ m. **K.** Representative  $T_{RM}$  cell tracks in presence of EDTA (n = 75). **L.** Mean displacement over time of  $T_{RM}$  tracks. Numbers indicate motility coefficients ( $\mu$ m<sup>2</sup>/min). Data in C, G, H, I and L were pooled from at least 2 independent experiments each. Statistical analysis was performed with unpaired t-test (C) or Kruskal-Wallis with Dunn's multiple comparison in G - I (as compared to " $T_{RM}$ "). \*\*, p < 0.01; \*\*\*, p < 0.001.

1061

**Fig. 4.  $T_{RM}$  insert protrusions for cell displacement in absence of external chemoattractants and friction.** **A.** Experimental layout. Arrows indicate protrusion direction. **B.** Image sequences of  $T_{RM}$  within  $T_N$  clusters in presence of EDTA. Arrowheads show membrane protrusions; segmented line indicates cell track. Scale bar, 10  $\mu$ m. Time in min:s. **C.** Graphical representation of  $T_{RM}$  inside  $T_N$  cluster (i) or dispersed (ii). **D.**  $T_{RM}$  track speeds according to their location. Numbers indicate percentage of tracks > 3  $\mu$ m/min (boxed). Lines indicate

1067 median. **E.** Meandering index of  $T_{RM}$  tracks sorted according to their location. Lines indicate median. **F.** Image  
 1068 sequences of  $T_{RM}$  alone (top) and with 7  $\mu$ m polystyrene beads (bottom) in presence of EDTA. Arrowheads  
 1069 show membrane protrusions. Segmented line indicates cell track. Scale bar, 10  $\mu$ m, time in min:s. **G.**  $T_{RM}$  track  
 1070 speeds according to their association with or without beads. Numbers indicate percentage of tracks > 3  
 1071  $\mu$ m/min (boxed). Lines indicate median. **H.** Meandering index of  $T_{RM}$  tracks sorted according to their location.  
 1072 Lines indicate median. Data in D, E, G and H are pooled from 4 - 5 independent experiments. Statistical  
 1073 analysis was performed with Mann-Whitney test. \*\*\*,  $p < 0.001$ .

1074

1075 **Fig. 5. Residual *in vivo* SMG  $T_{RM}$  motility during inhibition of  $G_{\alpha i}$  and integrins.** **A.** Experimental layout. **B.**  
 1076 OT-I  $T_{PLN-M}$  and  $T_{RM}$  speeds after combined anti- $\alpha L$ ,  $\alpha 4$  and  $\alpha E$  integrin mAb ( $\alpha Itg$ ) inhibition. Arrows indicate  
 1077 median values ( $\mu$ m/min). **C.** 2PM image of  $T_{RM}$  – tissue macrophage colocalization in  $\alpha Itg$ -treated SMG.  
 1078 Arrows indicate T cell – tissue macrophage contacts. Scale bar, 20  $\mu$ m. **D.** OT-I  $T_{RM}$  speeds in SMG after WD  
 1079 administration of RAD or RGD peptide. **E.** WT and CXCR3<sup>-/-</sup> OT-I  $T_{RM}$  speeds in SMG in memory phase ( $\geq$  day  
 1080 30 p.i.). Arrows indicate median values ( $\mu$ m/min). **F.** OT-I  $T_{PLN-M}$  and  $T_{RM}$  speeds after systemic treatment with  
 1081 active PTx or inactive (mutant) PTx (PTx<sub>mut</sub>). Arrows indicate median values ( $\mu$ m/min). **G.** 2PM image of  $T_{RM}$  –  
 1082 tissue macrophage colocalization in PTx-treated SMG. Arrows indicate T cell – tissue macrophage contacts.  
 1083 Scale bar, 20  $\mu$ m. **H.** Flow cytometry plot of mixed  $T_{RM}$  and macrophages. **I.** Quantification of cluster formation  
 1084 as shown in H. **J.** Example image sequences showing  $T_{RM}$  in transient contact with macrophages under agarose  
 1085 on fibronectin-coated plates.  $T_{RM}$  displacement is shown by segmented line. Scale bar, 50  $\mu$ m. Time in min:s.  
 1086 **K.**  $T_{RM}$  – macrophage contact duration for individual tracks. Data in B, D, E and F are pooled from 2-5  
 1087 independent experiments with a total of 2-7 mice with at least 111 tracks per condition and analyzed with  
 1088 unpaired Student's t-test. Data in I are pooled from 2 independent experiments and analyzed using unpaired  
 1089 Student's t-test. \*\*\*,  $p < 0.001$ .

1090

1091 **Fig. 6. Tissue macrophage attachment in SMG.** **A.** Experimental layout of super-resolution shadow imaging  
 1092 (SUSHI) of SMG slices. **B.** Example of SUSHI image for determination of extracellular space. E, epithelium; BV,  
 1093 blood vessel. Scale bar, 10  $\mu$ m. **C.** Overview of ECS signal with SMG epithelium (E) and CD11c-YFP<sup>+</sup> tissue

1094 macrophages. Scale bar, 10  $\mu$ m. **D.** Example of epithelial attachment before and after hyperosmotic  
 1095 challenge. Arrows show interepithelial junctions. Scale bar, 5  $\mu$ m. **E.** Example of macrophage detachment  
 1096 before and after hyperosmotic challenge. Arrowheads indicate detachment. Scale bar, 5  $\mu$ m. **F.**  
 1097 Quantification of gap size between macrophage and epithelium before and after hyperosmotic challenge. **G.**  
 1098 Immunofluorescent SMG section showing macrophages and epithelial cells in acini and ducts (identified by  
 1099 luminal ZO-1 labelling). Yellow dashed lines indicate outlines of acini and ducts. Scale bar, 10  $\mu$ m. **H.** Confocal  
 1100 image of SMG section with macrophage protrusions traversing a basement membrane below an epithelial  
 1101 acinus (indicated by arrow). Scale bar, 20  $\mu$ m (overview) and 5  $\mu$ m (insert). **I.** Electron microscopy image of  
 1102 macrophages creating a discontinuation of the basement membrane of an acinus (indicated by arrow).  
 1103 Numbers mark two neighboring macrophages. Arrowheads indicate lack of tight adhesion between  
 1104 macrophages and neighboring cells. Scale bar, 2  $\mu$ m. All images are representative of at least 2 independent  
 1105 experiments. Data in F were analyzed using a paired t-test. \*\*\*,  $p < 0.001$ .

1106

1107 **Fig. 7. Tissue macrophages assist  $T_{RM}$  patrolling of SMG.** **A.** 2PM time-lapse image sequence of  $T_{RM}$  in DTx-  
 1108 treated CD11c-YFP or CD11c-DTR  $\rightarrow$  Ubi-GFP chimeras. Magenta lines indicate outlines of acini, white  
 1109 segmented lines indicate cell tracks. Scale bar, 50  $\mu$ m (overview) and 20  $\mu$ m (insert). Time in min:s. **B.** Example  
 1110  $T_{RM}$  tracks in presence or absence of macrophage. Scale bar, 10  $\mu$ m. **C.** Frequency distribution of  $T_{RM}$  speeds  
 1111 in DTx-treated CD11c-YFP or CD11c-DTR bone marrow chimera. Arrows indicate median ( $\mu$ m/min). **D.** Track  
 1112 analysis outline. Top panel. U-turns (red) describe tracks reversing direction while excluding continuous  
 1113 turns. Bottom panel. Synthetic tracks were generated to assess dwell time in an 80  $\mu$ m-diameter sphere  
 1114 (black). One example track is shown for control (light blue) and macrophage-depleted (dark blue) condition.  
 1115 **E.** Percent of tracks making U-turn. Bars indicate 95% confidence intervals. **F.** *In silico* dwell times for  $T_{RM}$   
 1116 tracks in 80  $\mu$ m-spheres based on measured track parameters. **G.** 2PM time-lapse image sequences of  $T_{RM}$   
 1117 crawling along a macrophage to enter acini. Epithelial signal was manually masked to show an isolated acinus  
 1118 in zoomed panels. Dashed white line indicates area displayed in xz-view, and arrow indicates  $T_{RM}$  -  
 1119 macrophage contact. Top: Scale bar, 50  $\mu$ m (overview) and 20  $\mu$ m (insert); bottom: Scale bar, 20  $\mu$ m  
 1120 (overview) and 10  $\mu$ m (insert). Time in min:s. **H.** Percentage of  $T_{RM}$  transitions into or out of acini and ducts



1121 in CD11c-YFP -> Ubi-GFP chimeras (n = 42) with and without contact to macrophages. **I, J.** 2PM time-lapse  
 1122 image sequence of CD11cYFP -> Ubi-GFP and DTx-treated CD11cDTR->Ubi-GFP chimeras were analyzed for  
 1123  $T_{RM}$  crossing events (leaving or entering acini). **I** shows average transitions per hour track duration, and **J**  
 1124 depicts transitions per 1000  $\mu\text{m}$  total distance migrated. Data points represent individual image sequences.  
 1125 Line indicates mean. **K.** Experimental layout for analysis of  $T_{RM}$  response to local chemokine. CXCL10 was  
 1126 injected with a fluorescent tracer for 4 h to allow  $T_{RM}$  accumulation. Integrin blocking mAbs prevent  
 1127 recruitment of circulating T cells. **L.**  $T_{RM}$  per  $\text{cm}^2$  at sites of CXCL10 injection in presence or absence of  
 1128 macrophages. Numbers indicate mean  $\pm$  SD. Data in C, I, J and L are pooled from 2-4 independent  
 1129 experiments with 4-6 mice total. Data in C, I and J were analyzed with Mann-Whitney and data in L were  
 1130 analyzed with Wilcoxon rank test. \*,  $p < 0.05$ ; \*\*\*,  $p < 0.001$ .



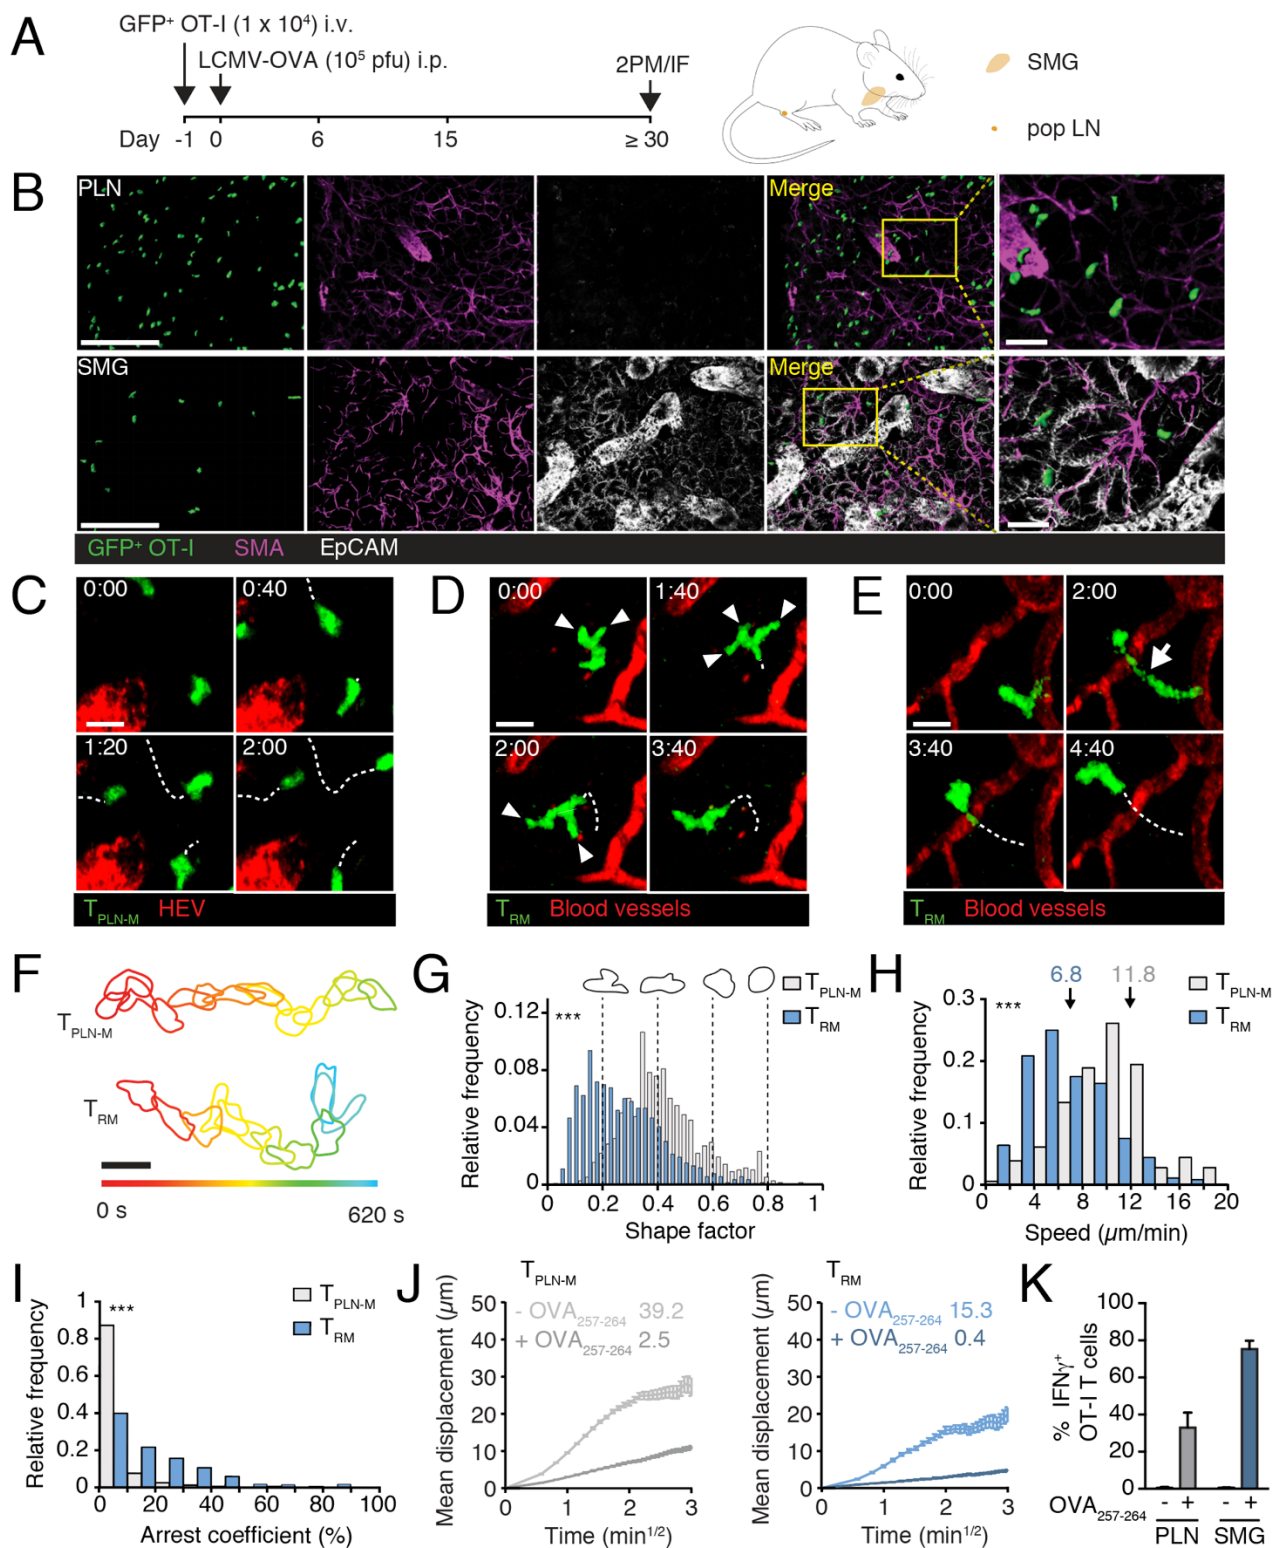

Figure 1

1131

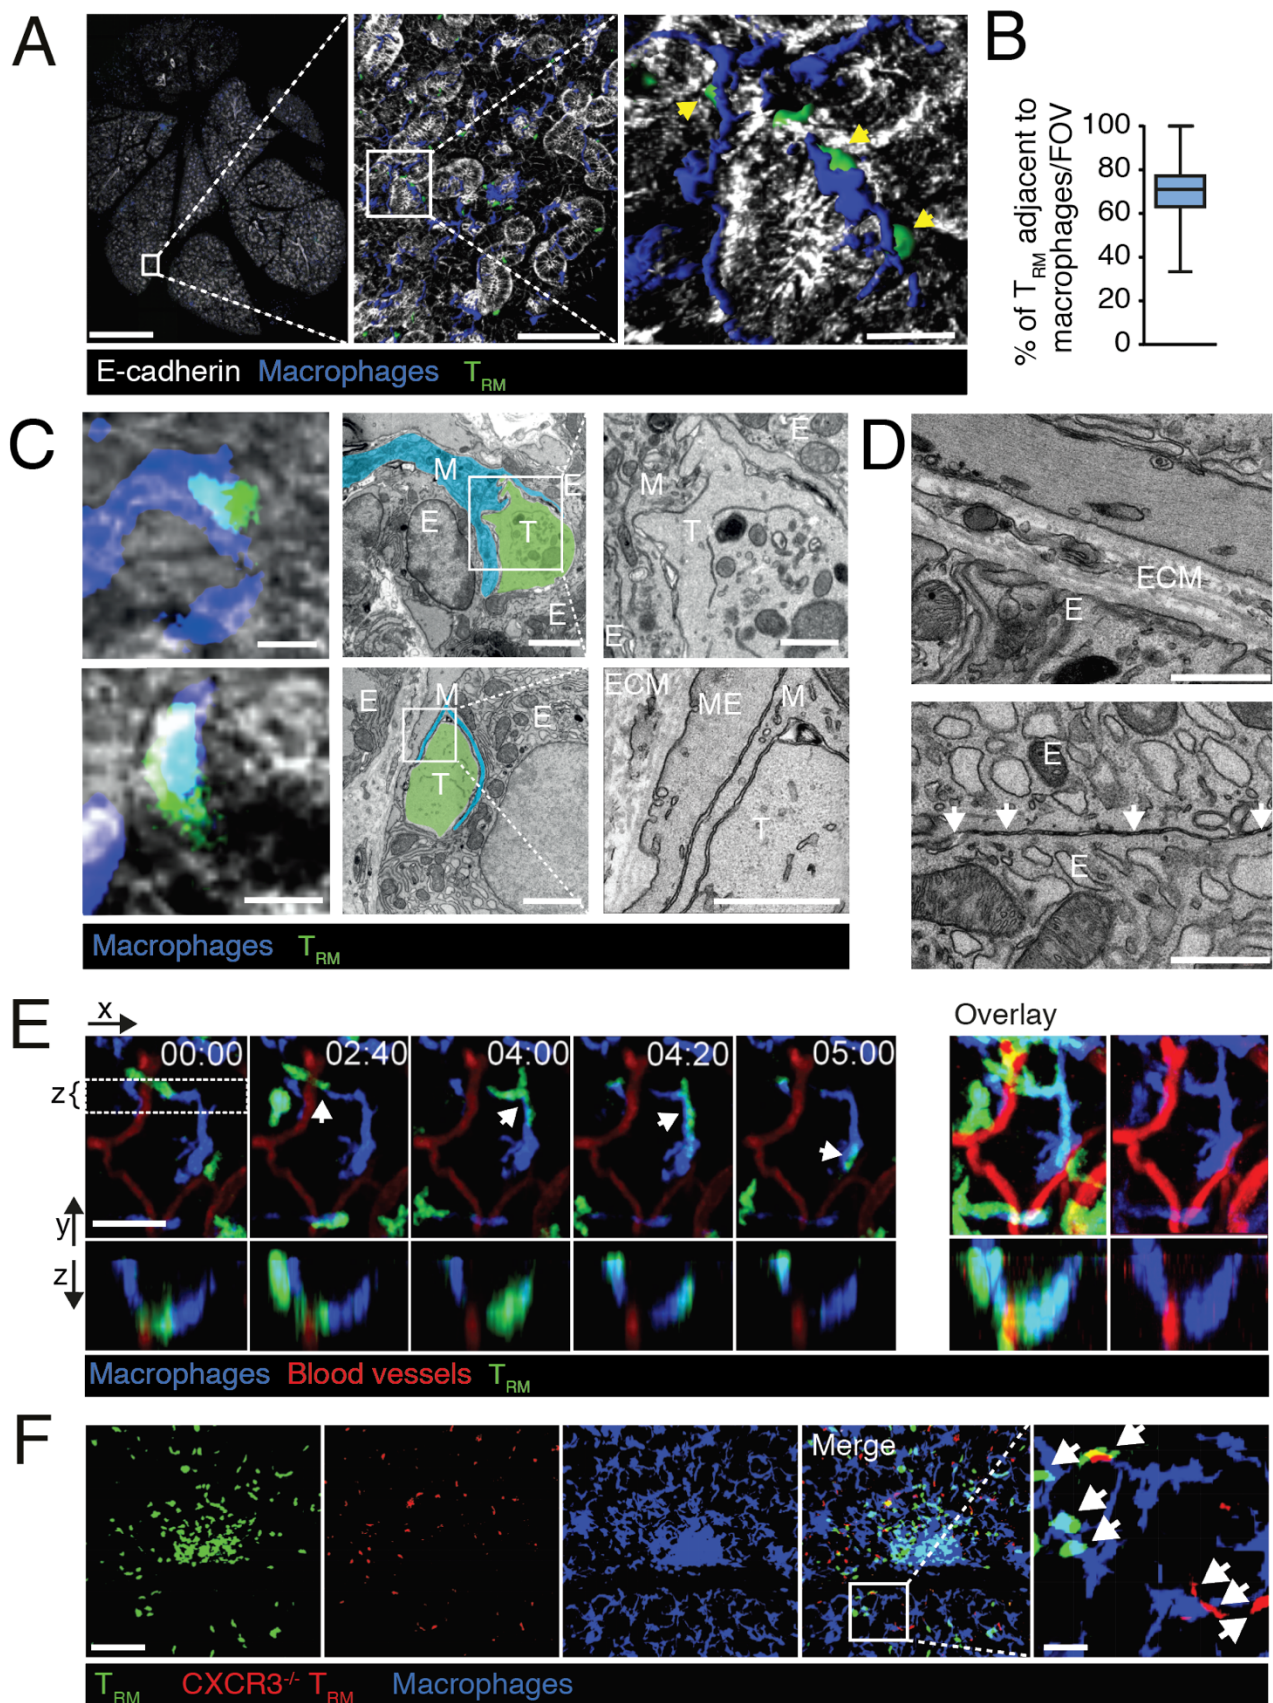

Figure 2

1132

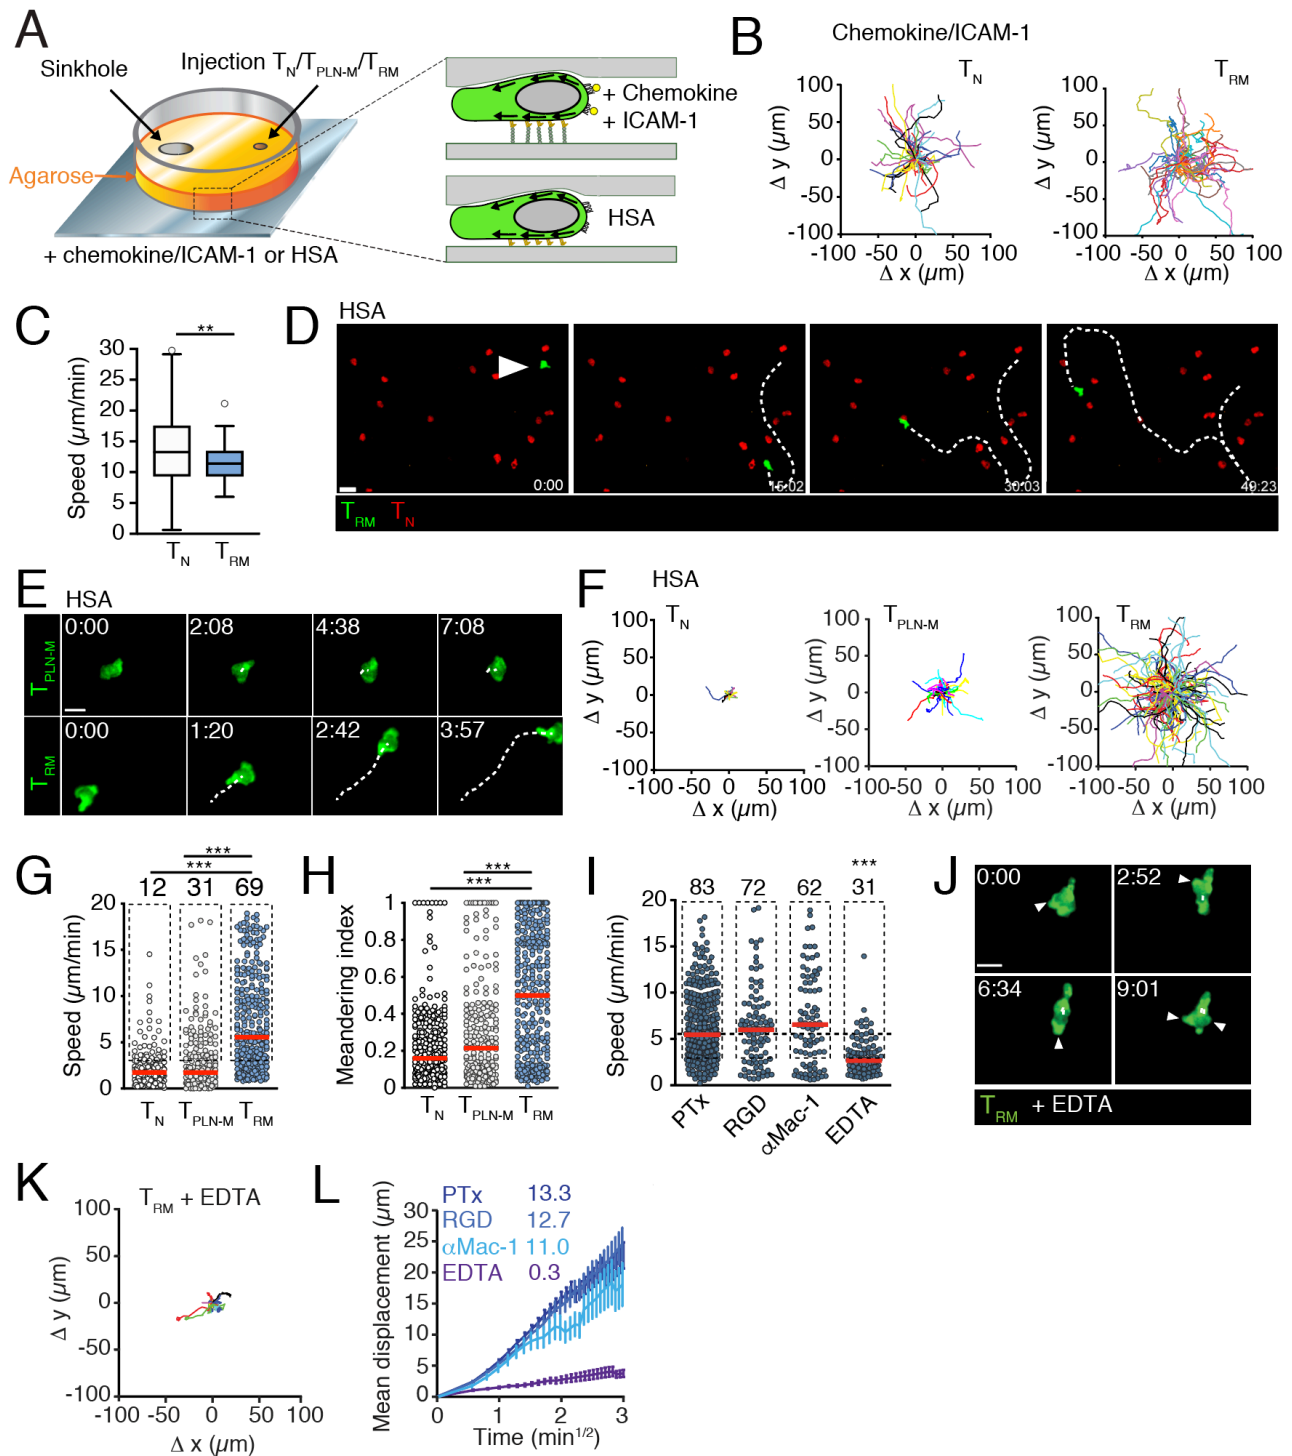

Figure 3

1133



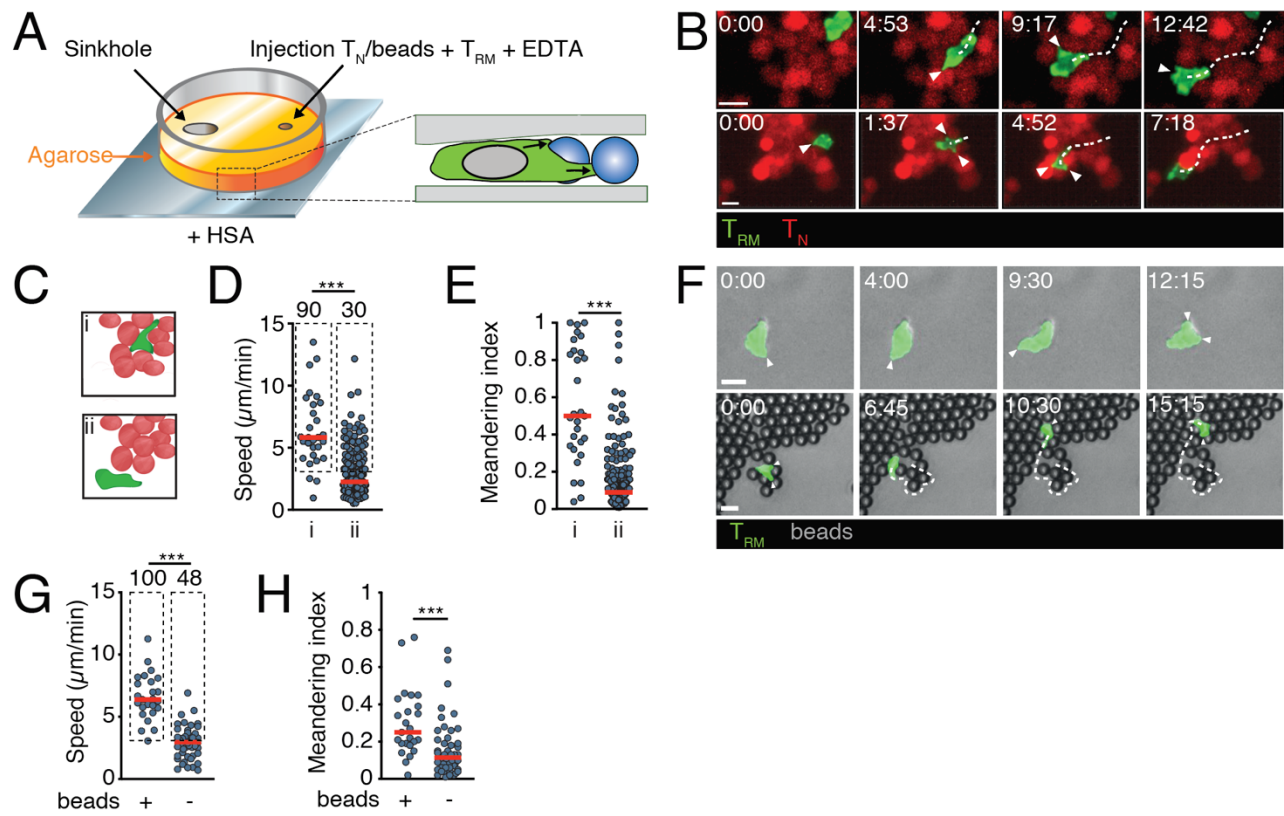

Figure 4

1134

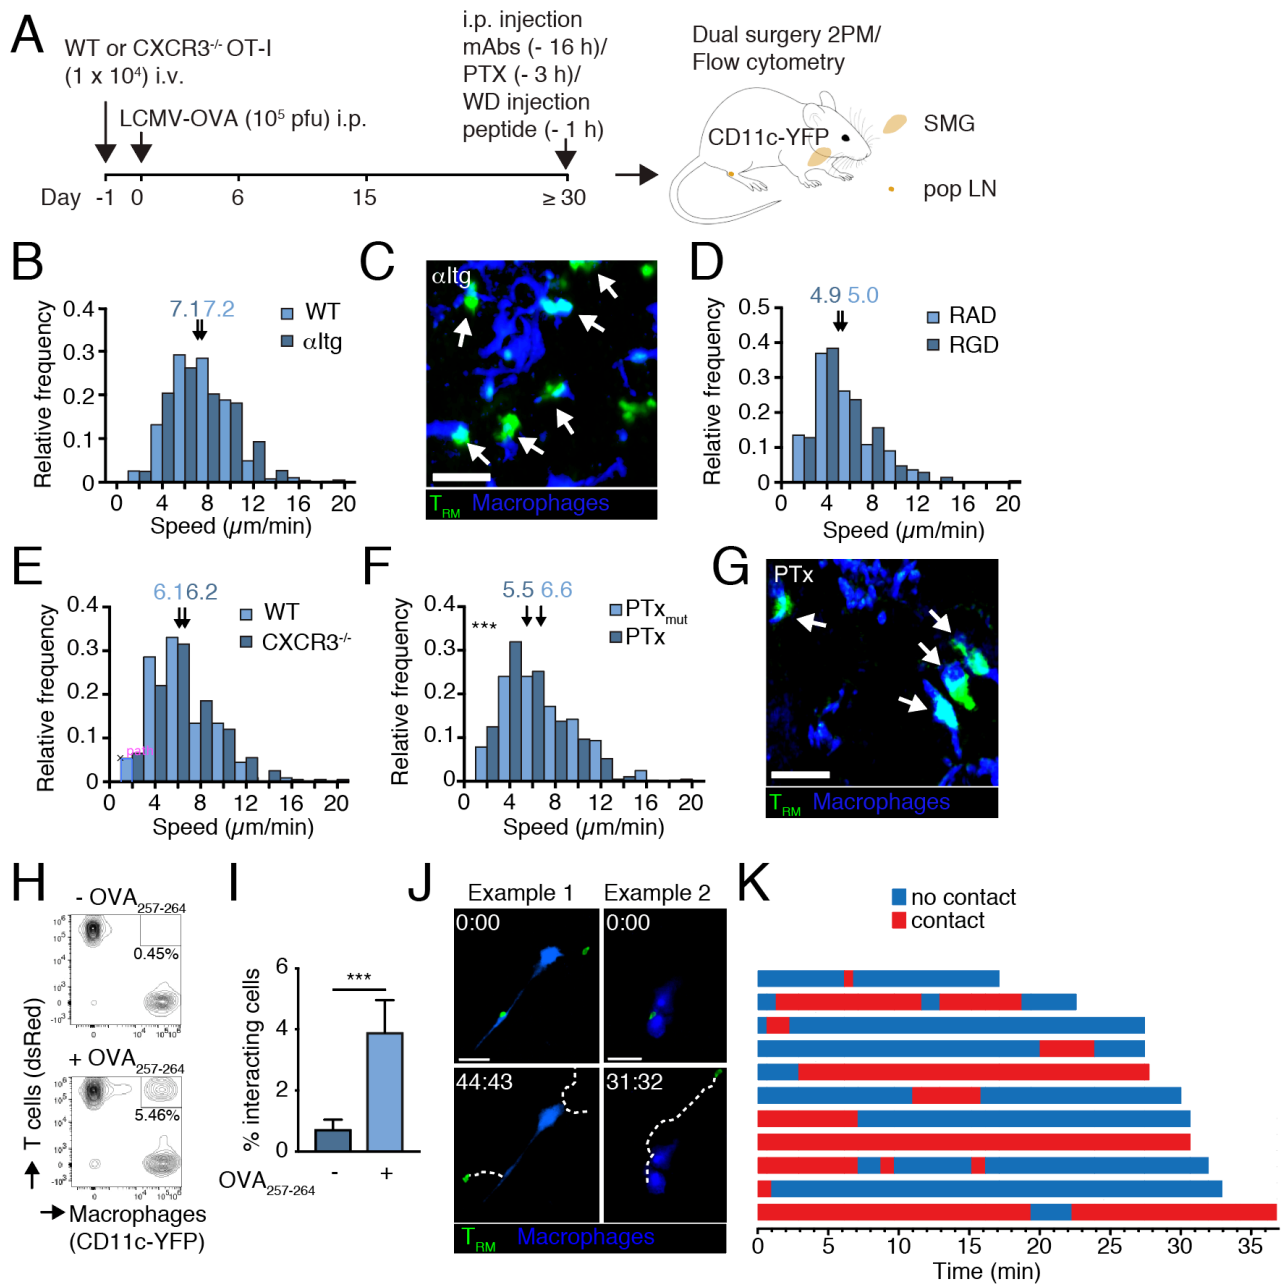

Figure 5

1135

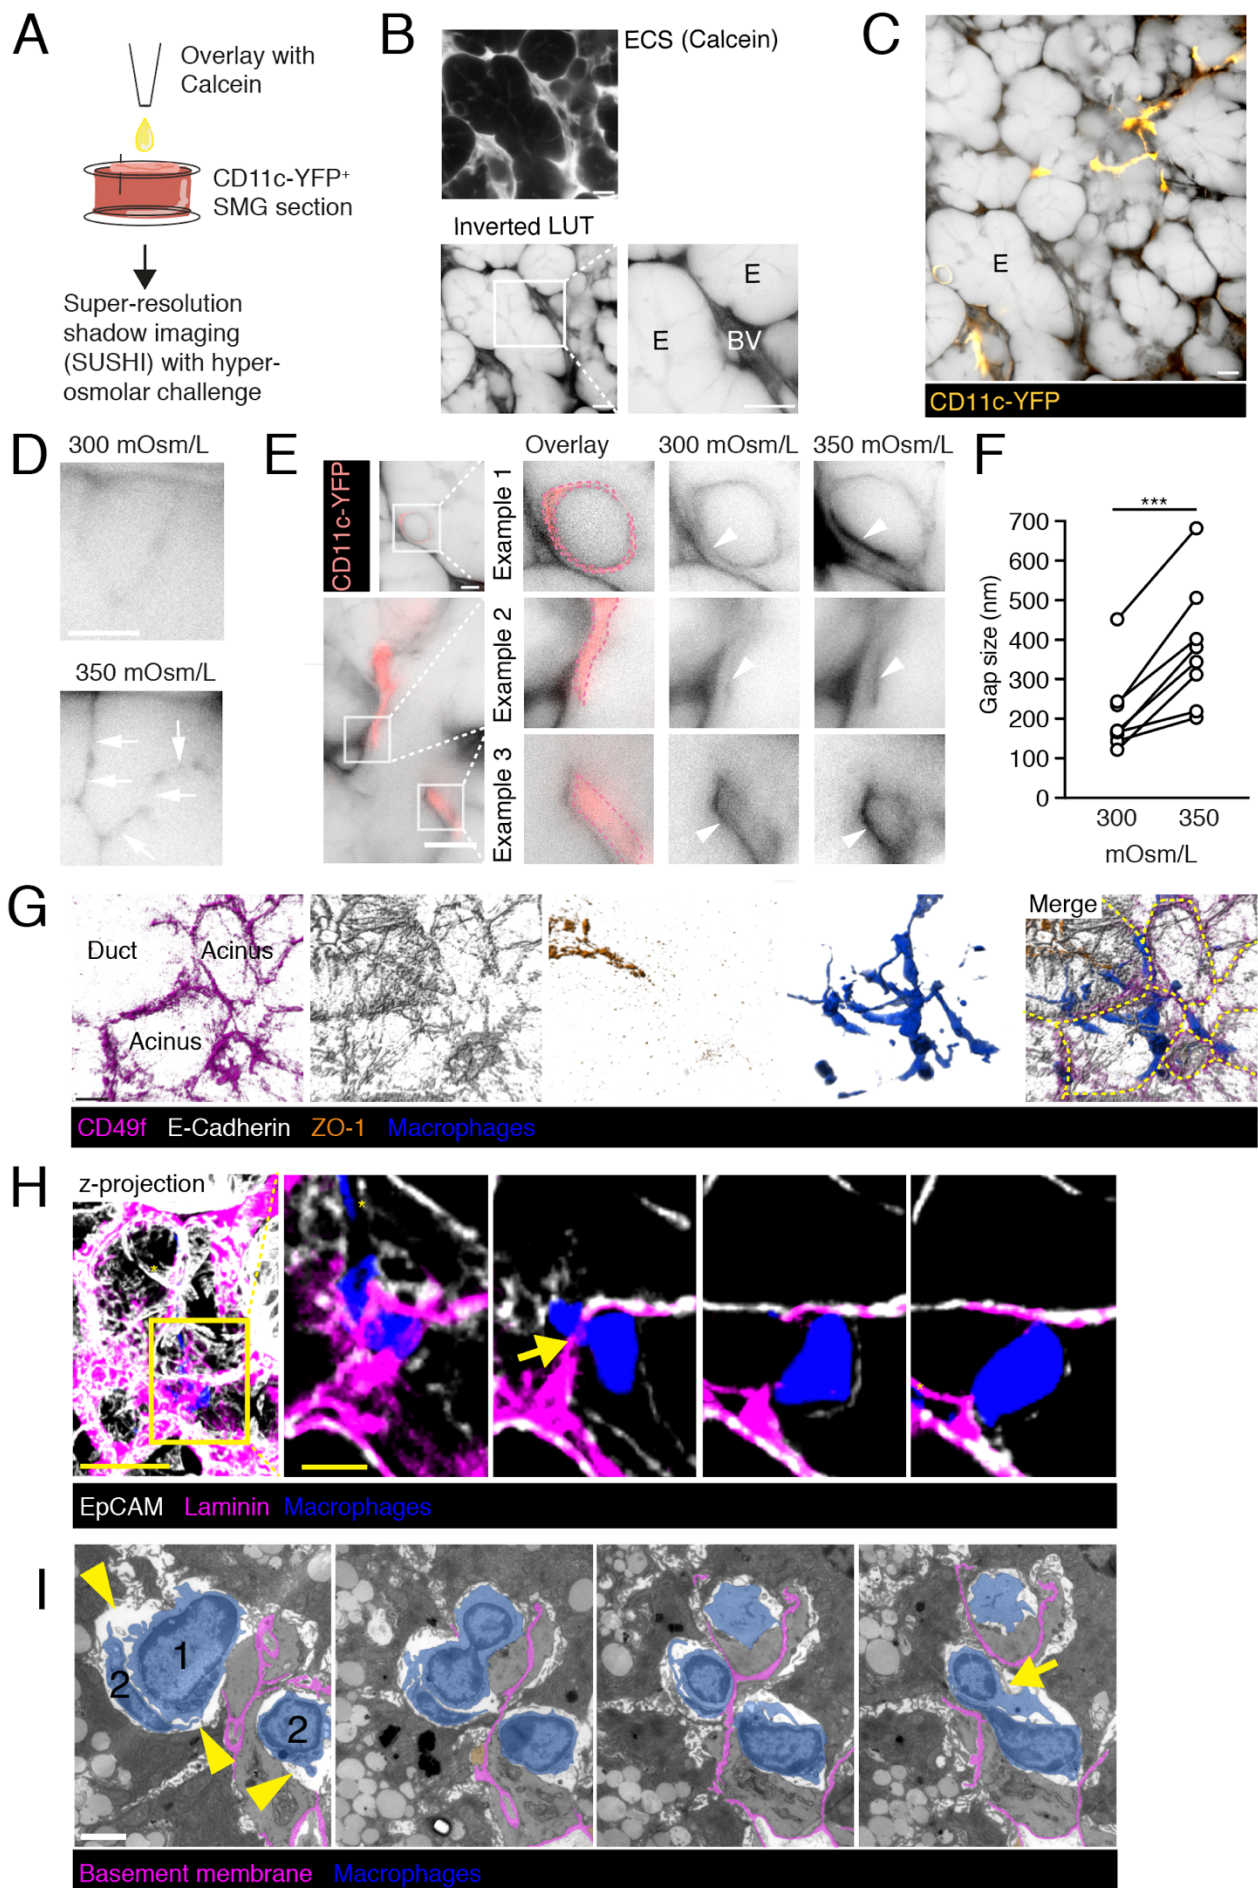



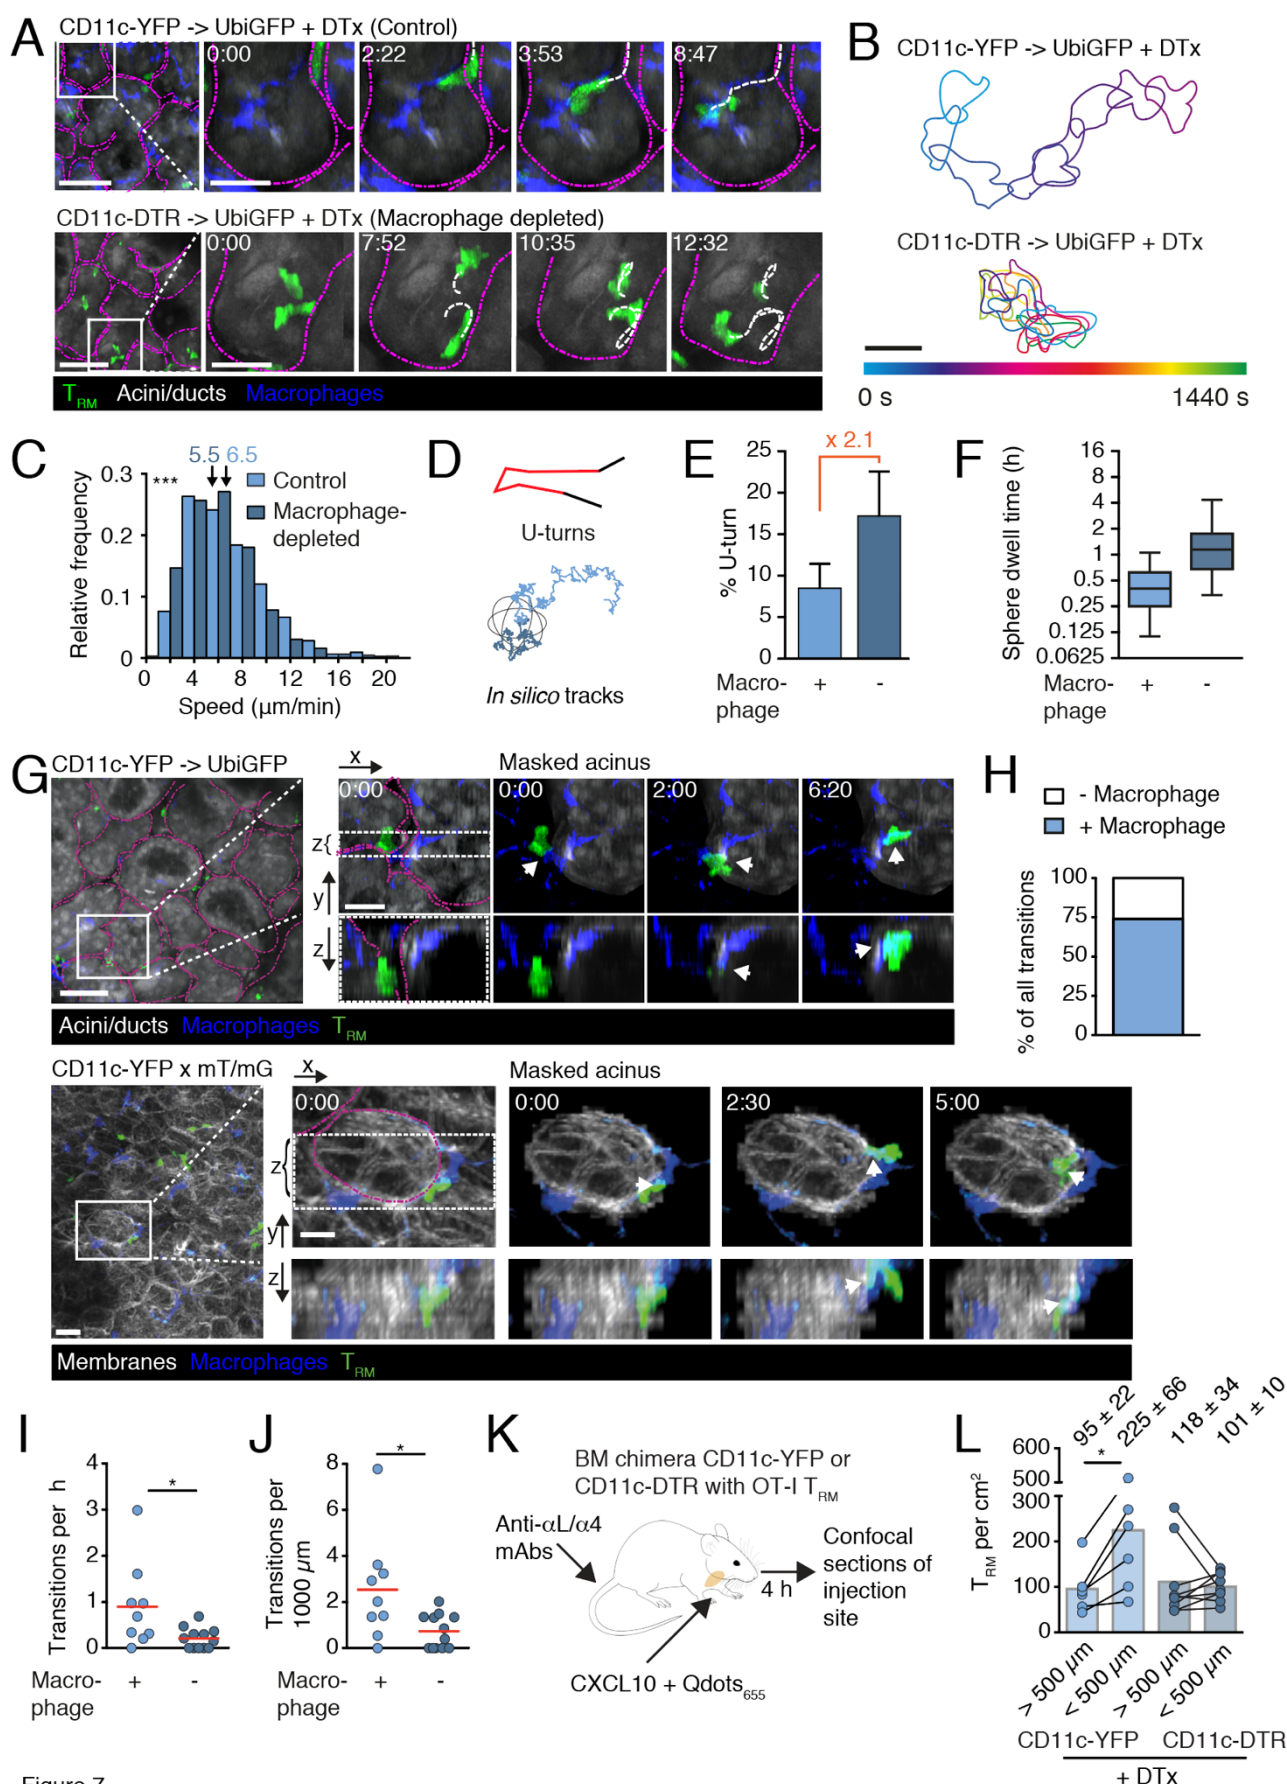

Figure 7
